# Supplementary material for: The genetic architecture of brainstem structures
Source: Research Square preprint supplement (doi:10.21203/rs.3.rs-5060768/v1), 2024-10-09
Supplement: Supplementary file 1 [file 687a18a8adafd044ac8a4df6.xlsx]

## Sheet: Index
Table	Contents
Supplementary Table 1	The test-retest reliability of brainstem and substructure volumes.
Supplementary Table 2	Demographic and brainstem volumetric data of participants from different datasets.
Supplementary Table 3	Participants and genetic variants included in each GWAS.
Supplementary Table 4	The population straitification of GWASs.
Supplementary Table 5	Genetic discovery (P < 5.56 × 10-9) in EAS-GWASs.
Supplementary Table 6	Genetic discovery (P < 5.56 × 10-9) in ABCD-GWASs.
Supplementary Table 7	Genetic discovery (P < 5.56 × 10-9) in UKBB-GWASs.
Supplementary Table 8	Genetic discovery (P < 5.56 × 10-9) in EUR-GWASs.
Supplementary Table 9	Genetic discovery (P < 5.56 × 10-9) in cross-ancestry GWAS meta-analyses.
Supplementary Table 10	The pooled significant variant-trait and locus-trait associations.
Supplementary Table 11	The pooled LD-independent loci significantly associated with brainstem volumetric traits.
Supplementary Table 12	The heretibility estimation of brainstem volumetric traits in different ancestry populations.
Supplementary Table 13	The cross-ancestry genetic correlations of brainstem volumetric traits.
Supplementary Table 14	Ancestry-shared and ancestry-specific associations in 369 variant-trait associations included in both CHIMGEN-GWASs and UKBB-GWASs.
Supplementary Table 15	Replication of the discovered three ancestry-specific and 300 ancestry-shared associations using ABCD-GWASs.
Supplementary Table 16	Causal variants identified by statistical fine-mapping.
Supplementary Table 17	Statistical fine-mapping for 223 locus-trait associations based on cross-ancestry and EUR GWASs using PAINTOR with one causal variant assumption.
Supplementary Table 18	Functional annotations for potentially causal variant with PP > 0.1 from significant locus-trait associations identified by EAS-GWASs.
Supplementary Table 19	Functional annotations for potentially causal variant with PP > 0.1 from significant locus-trait associations identified by EUR-GWASs.
Supplementary Table 20	Functional annotations for potentially causal variant with PP > 0.1 from significant locus-trait associations identified by cross-ancestry GWASs.
Supplementary Table 21	Significant gene-trait associations identified by gene-based association analysis using MAGMA.
Supplementary Table 22	Significant gene-trait associations identified by TWASs across 13 brain tissues using S-MultiXcan.
Supplementary Table 23	Significant gene-trait associations identified by chromatin interaction association analysis using H-MAGMA.
Supplementary Table 24	Significant pathways enriched by prioritized genes associated with brainstem volumetric traits.
Supplementary Table 25	Shared and distinct genetic loci between brainstem substructure volumes.
Supplementary Table 26	Shared and distinct genes between brainstem substructure volumes.
Supplementary Table 27	Significant pathways associated with prioritized genes for medulla, pons, and midbrain regardless of absolute or relative volume.
Supplementary Table 28	Shared and distinct enrichment pathways between brainstem substructure volumes.
Supplementary Table 29	Resources of GWAS summary statistics for non-imaging phenotypes potentially associated with brainstem functions.
Supplementary Table 30	Genetic correlations between brainstem volumetric traits and non-imaging phenotypes.
Supplementary Table 31	Colocalizations (PP.H4 > 0.8) between loci associated with brainstem volumetric traits and non-imaging phenotypes.
Supplementary Table 32	Shared variant-trait associations between brainstem volumetric traits and non-imaging phenotypes identified by conjunctional FDR analyses.
Supplementary Table 33	Inclusion and exclusion criteria for the CHIMGEN participants.
Supplementary Table 34	Brain structural MRI scan parameters for different types of MRI scanners in CHIMGEN.
Supplementary Table 35	Correlations between brainstem and substructure absolute volumes in different datasets.

## Sheet: Table S1
Supplementary Table 1. The test-retest reliability of brainstem and substructure volumes.
Intraclass correlation coefficient	Medulla volume	Pons volume	Midbrain volume	SCP volume	Whole brainstem volume
CHIMGEN test-retest dataset (n = 24)	0.868	0.992	0.948	0.888	0.972
ABCD test-retest dataset (n = 4,077)	0.897	0.992	0.982	0.9	0.98
UK Biobank test-retest dataset (n = 2,698)	0.936	0.989	0.975	0.928	0.984
Two segmentation methods in CHIMGEN (n = 7,096)	-	-	-	-	0.986
Two segmentation methods in ABCD (n = 5,815)	-	-	-	-	0.956
Two segmentation methods in UK Biobank (n = 35,611)	-	-	-	-	0.997
Note: The brainstem substructure volumes are obtained only from the Bayesian brainstem segmentation approach, while whole brainstem volume is obtained from both Bayesian brainstem segmentation (including SCP) and automatic subcortical segmentation (not including SCP) approaches. Abbereviation: SCP, superior cerebellar peduncle.

## Sheet: Table S2
Supplementary Table 2. Demographic and brainstem volumetric data of participants from different datasets.
Variable	CHIMGEN	ABCD	UKBB
Number of participants	7096	6060	35611
Age (years)	23.68 ± 2.48	9.93 ± 0.63	55.30 ± 7.46
Sex (Male/Female)	2,518/4,578	3,180/2,880	17,068/18,543
TIV (mm3)	1,497,319.57 ± 176,606.88	1,520,382.50 ± 137,829.19	1,551,159.36 ± 152,193.36
Whole brainstem volume (mm3)	24,563.52 ± 2,553.48	19,107.41 ± 1,957.93	26,235.49 ± 2,944.53
Medulla volume (mm3)	4,213.22 ± 594.68	4,220.77 ± 432.56	4,668.40 ± 546.30
Pons volume (mm3)	14,096.29 ± 1,611.86	13,251.16 ± 1,521.63	15,211.23 ± 1,878.12
Midbrain volume (mm3)	5,990.45 ± 592.24	6,151.85 ± 550.15	6,072.29 ± 615.09
SCP volume (mm3)	262.04 ± 48.81	235.72 ± 44.44	281.88 ± 57.32
Abbereviations: ABCD, the Adolescent Brain Cognitive Development study; CHIMGEN, the Chinese Imaging Genetics study; SCP, superior cerebellar peduncle; TIV, total incracranial volume; UKBB, the UK Biobank study.

## Sheet: Table S3
Supplementary Table 3. Participants and genetic variants included in each GWAS.
Trait	EAS-GWAS					ABCD-GWAS					UKBB-GWAS					EUR-GWAS			Cross-ancestry
	Participants	Input variants		Output variants		Participants	Input variants		Output variants		Participants	Input variants		Output variants		Participants	Autosomal variants	X-chromosomal variants	Participants	Autosomal variants	X-chromosomal variants
		Autosome	X-chromosome	Autosome	X-chromosome		Autosome	X-chromosome	Autosome	X-chromosome		Autosome	X-chromosome	Autosome	X-chromosome
Whole brainstem volume	7096	8790144	227168	8025168	212695	6060	9064819	278985	9064819	277406	35611	10042001	390192	9292337	301913	65621	9755044	317092	72717	6307014	176518
Medulla absolute volume	7095	8790144	227168	8024892	212682	5815	9064819	278985	9039816	277385	35606	10042001	390192	9292493	301917	41421	9615838	315504	48516	6295726	176318
Medulla relative volume	7095	8790144	227168	7568760	212682	5815	9064819	278985	9039816	277385	35606	10042001	390192	9292493	301917	41421	9610051	315156	48516	6291959	176267
Pons absolute volume	7095	8790144	227168	8024892	212686	5814	9064819	278985	9039595	277378	35611	10042001	390192	9292391	301914	41425	9636286	316892	48520	6298419	176479
Pons relative volume	7095	8790144	227168	8024892	212682	5814	9064819	278985	9039595	277378	35611	10042001	390192	9292391	301914	41425	9596443	314251	48520	6292765	176152
Midbrain absolute volume	7096	8790144	227168	8025000	212677	5815	9064819	278985	9039816	277385	35611	10042001	390192	9292367	301913	41426	9637747	316973	48522	6298548	176480
Midbrain relative volume	7096	8790144	227168	8024791	208889	5815	9064819	278985	9039816	277385	35611	10042001	390192	9292367	298800	41426	9618794	313024	48522	6296490	176013
SCP absolute volume	7094	8790144	227168	8025039	212683	5804	9064819	278985	9037605	277310	35521	10042001	390192	9292433	301914	41325	9629261	316411	48419	6297752	176437
SCP relative volume	7094	8790144	227168	8024476	212672	5804	9064819	278985	9037605	277310	35521	10042001	390192	9220148	301914	41325	9573472	316336	48419	6252975	176429
Abbereviations: ABCD, the Adolescent Brain Cognitive Development study; CHIMGEN, the Chinese Imaging Genetics study; GWAS, genome-wide association study; SCP, superior cerebellar peduncle; UKBB, the UK Biobank study.

## Sheet: Table S4
Supplementary Table 4. The population straitification of GWASs.
Trait	EAS-GWAS		ABCD-GWAS		UKBB-GWAS		EUR-GWAS		Cross-ancestry GWAS
	Lambda GC	LDSC Intercept	Lambda GC	LDSC Intercept	Lambda GC	LDSC Intercept	Lambda GC	LDSC Intercept	Lambda GC	LDSC Intercept
Whole brinastem volume	1.032	1.0099	1.025	1.0006	1.152	1.0304	1.143	1.001	1.23	1.0243
Medulla absolute volume	1.006	0.9975	1.016	0.9888	1.131	0.9939	1.14	0.9935	1.189	1.0012
Medulla relative volume	1.005	0.9931	1.01	1.0001	1.128	1.0035	1.13	1.007	1.182	1.0205
Pons absolute volume	1.036	1.0109	1.029	1.0046	1.153	1.0209	1.17	1.0228	1.215	1.026
Pons relative volume	1.011	1.0102	1.024	1.0003	1.131	1.0032	1.14	1.0051	1.185	1.0214
Midbrain absolute volume	1.02	1.0059	1.025	0.9977	1.144	1.011	1.16	1.0125	1.216	1.0173
Midbrain relative volume	1.012	0.9999	1.048	1.0153	1.125	1.0145	1.14	1.0223	1.201	1.0207
SCP absolute volume	1.024	0.9967	1.025	0.9992	1.098	1.0022	1.11	1.0037	1.156	1.0124
SCP relative volume	1.036	0.9955	1.024	1.0015	1.093	1.0022	1.1	1.0033	1.14	1.0132
Abbreviation: ABCD, the Adolescent Brain Cognitive Development study; CHIMGEN, the Chinese Imaging Genetics study; GC, genomic control; GWAS, genome-wide association study; LDSC, linkage disequilibrium score regression; SCP, superior cerebellar peduncle; UKBB, the UK Biobank study.

## Sheet: Table S5
Supplementary Table 5. Genetic discovery (P < 5.56 × 10-9) in EAS-GWASs.
Variant-trait association											Variant annotation				Locus-trait association			LD-independent locus
Trait	Variant	CHR	Position	A1	A2	Band	EAF	Beta	SE	P	Location	Nearest gene	CADD	RDB	TnLm	Start	End	Ln
Pons absolute volume	rs6547787	2	88929736	G	T	2p11.2	0.475282	0.0796944	0.0133846	2.61361e-09	ncRNA_exonic	EIF2AK3-DT	11.46	7	T1L1	88895123	88965164	L1
Note: TnLm means the mth locus for the nth trait. Ln is the nth LD-independent locus. Abbereviations: A1, effect allele; A2, non-effect allele; CADD, combined annotation-dependent depletion; CHR, chromosome; EAF, effect allele frequency; Nearest Gene, protein-coding gene containing the lead variant or nearest to the lead variant; RDB, RegulomeDB; SE, standard error.

## Sheet: Table S6
Supplementary Table 6. Genetic discovery (P < 5.56 × 10-9) in ABCD-GWASs.
Variant-trait association											Variant annotation				Locus-trait association			LD-independent locus
Trait	Variant	CHR	Position	A1	A2	Band	EAF	Beta	SE	P	Location	Nearest gene	CADD	RDB	TnLm	Start	End	Ln
Pons absolute volume	rs10983073	9	118927725	C	T	9q33.1	0.396715	0.0890649	0.0140402	2.2452e-10	intronic	PAPPA	3.194	5	T1L1	118917007	118978682	L1
Pons relative volume	rs6775519	3	15990231	G	A	3p25.1	0.26462	0.0288703	0.00474423	1.16238e-09	intergenic	AC090945.1	5.156	4	T2L1	15979480	15992135	L2
Midbrain absolute volume	rs12449302	17	29411573	C	T	17q11.2	0.129321	0.113288	0.017654	1.38869e-10	ncRNA_intronic	RP11-848P1.9	1.423	6	T3L1	29390169	29623288	L3
Note: TnLm means the mth locus for the nth trait. Ln is the nth LD-independent locus. Abbereviations: A1, effect allele; A2, non-effect allele; CADD, combined annotation-dependent depletion; CHR, chromosome; EAF, effect allele frequency; Nearest Gene, protein-coding gene containing the lead variant or nearest to the lead variant; RDB, RegulomeDB; SE, standard error.

## Sheet: Table S7
Supplementary Table 7. Genetic discovery (P < 5.56 × 10-9) in UKBB-GWASs.
Variant-trait association											Variant annotation				Locus-trait association			LD-independent locus
Trait	Variant	CHR	Position	A1	A2	Band	EAF	Beta	SE	P	Location	Nearest gene	CADD	RDB	TnLm	Start	End	Ln
Whole brainstem volume	rs3789586	1	51054322	T	C	1p32.3	0.15032	0.0467448	0.00749068	4.36456e-10	intronic	FAF1	3.193	7	T1L1	50832097	51435015	L1
	rs1430036	2	16603087	T	G	2p24.3	0.827091	0.0420064	0.00705589	2.62661e-09	ncRNA_intronic	AC010880.1	15.62	6	T1L2	16593926	16605174	L2
	rs13388394	2	33764176	G	A	2p22.3	0.0415696	0.0782063	0.013415	5.54981e-09	exonic (missense)	RASGRP3	17.72	7	T1L3	33764176	33764176	L3
	rs7571971	2	88895351	C	T	2p11.2	0.717787	-0.0417323	0.00592559	1.88524e-12	UTR5	EIF2AK3	3.564	7	T1L4	88870632	89099183	L4
	rs1063657	2	177017871	T	C	2q31.1	0.205812	0.0427604	0.00667654	1.50787e-10	UTR3	HOXD3:HOXD4	11.61	2b	T1L5	177006484	177073191	L5
	rs372083987	2	177073184	T	A	2q31.1	0.0329517	-0.0943829	0.0150476	3.55753e-10	intergenic	AC016739.2	1.294	7
	rs16863657	2	223164518	G	A	2q36.1	0.123541	-0.0565077	0.00831494	1.07621e-11	intronic	CCDC140	4.904	4	T1L6	223155911	223164518	L6
	rs78094954	3	69881136	A	G	3p13	0.215622	0.0409133	0.00652095	3.51582e-10	intronic	MITF	0.959	7	T1L7	69815329	69909425	L7
	rs6444748	3	193541025	A	C	3q29	0.452122	0.0449187	0.00555195	5.93598e-16	intergenic	RP11-528A4.2	1.928	3a	T1L8	193535632	193557301	L8
	rs13136309	4	15134596	C	T	4p15.33	0.392201	-0.0347077	0.00553422	3.57657e-10	ncRNA_intronic	RP11-665G4.1	5.315	4	T1L9	15121280	15190356	L9
	rs10027331	4	15149569	A	G	4p15.33	0.249839	-0.0512602	0.00615616	8.31566e-17	ncRNA_intronic	RP11-665G4.1	5.293	4
	rs2703156	4	77938810	C	T	4q21.1	0.608488	-0.0328217	0.00552848	2.90558e-09	intronic	SEPT11	5.21	NA	T1L10	77885451	77938885	L10
	rs2231142	4	89052323	T	G	4q22.1	0.114853	-0.0551568	0.00834508	3.85605e-11	exonic (stop gain)	ABCG2	22.3	NA	T1L11	88921565	89054667	L11
	rs961847	5	56041064	T	C	5q11.2	0.711867	0.0363991	0.00591721	7.67986e-10	intergenic	AC008940.1	9.332	NA	T1L12	56031884	56191200	L12
	rs72764483	5	64962816	G	A	5q12.3	0.254514	0.0563306	0.00615401	5.51333e-20	UTR3	SGTB	9.119	7	T1L13	64779214	65080091	L13
	rs115764052	5	118566243	T	C	5q23.1	0.0355888	-0.0854673	0.0144229	3.10804e-09	intronic	DMXL1	0.076	6	T1L14	118566243	118566243	L14
	rs72829213	6	7864764	T	C	6p24.3	0.0902039	0.0674272	0.00935445	5.67647e-13	intronic	BMP6	0.181	5	T1L15	7861317	7906748	L15
	rs2153960	6	108988184	A	G	6q21	0.708971	0.0594382	0.00583559	2.30268e-24	intronic	FOXO3	7.289	4	T1L16	108857876	109020332	L16
	rs12523793	6	149973764	A	G	6q25.1	0.331232	0.0415405	0.00568902	2.83788e-13	intergenic	KATNA1	1.657	7	T1L17	149874899	150180259	L17
	rs17136348	7	6074709	G	T	7p22.1	0.0427187	0.0772168	0.0132169	5.14983e-09	intronic	EIF2AK1:ANKRD61	3.404	7	T1L18	6035948	6074709	L18
	rs12536500	7	50808033	C	T	7p12.1	0.749119	0.0378886	0.00616285	7.85171e-10	intronic	GRB10	7.681	4	T1L19	50701406	50876001	L19
	rs151057105	7	54944920	T	C	7p11.2	0.0918203	0.0578414	0.00927537	4.48844e-10	intergenic	SNORA73	0.322	6	T1L20	54920906	54966738	L20
	rs142426754	7	99725210	T	G	7q22.1	0.0481599	-0.0741191	0.0125105	3.13192e-09	exonic (synonymous)	MBLAC1	9.991	3a	T1L21	99725210	99725210	L21
	rs985223	9	118935817	A	G	9q33.1	0.612558	-0.0618806	0.00551279	3.07676e-29	intronic	PAPPA	1.769	6	T1L22	118917007	119001088	L22
	rs62574179	9	118970563	G	A	9q33.1	0.0573897	0.0804105	0.0115817	3.84104e-12	intronic	PAPPA	7.15	6
	rs10786333	10	99090390	G	A	10q24.1	0.401727	-0.0320741	0.00547535	4.68757e-09	intergenic	FRAT2	3.421	7	T1L23	99000019	99097738	L23
	rs7939250	11	69002950	A	G	11q13.3	0.506063	0.0462823	0.00536118	5.98364e-18	intergenic	MYEOV	0.575	5	T1L24	68967247	69510653	L24
	rs1485995	11	69307707	A	G	11q13.3	0.671438	-0.0351679	0.00573563	8.70611e-10	intergenic	AP000439.3	0.127	NA
	rs1789166	11	69482091	A	C	11q13.3	0.645608	0.0374978	0.00560196	2.17604e-11	UTR3	ORAOV1	0.432	4
	rs11111090	12	102326461	C	A	12q23.2	0.481418	-0.0739885	0.00536102	2.50643e-43	intronic	DRAM1	3.741	5	T1L25	102094726	102946220	L25
	rs10860831	12	102409546	T	G	12q23.2	0.217658	0.0574714	0.00648699	8.03839e-19	intronic	CCDC53	0.686	1f
	rs11111293	12	102921296	C	T	12q23.2	0.220762	0.0558506	0.00642766	3.65338e-18	intergenic	RP11-210L7.1	19.36	2b
	rs1922432	12	107077232	A	G	12q23.2	0.352909	0.048376	0.00565397	1.16741e-17	ncRNA_intronic	RP11-144F15.1:RFX4:RP11-482D24.2	3.172	NA	T1L26	106739439	107522203	L26
	rs11642888	16	52802136	C	T	16q12.2	0.448498	0.0414132	0.005474	3.8656e-14	intergenic	RP11-297L17.6	7.915	6	T1L27	52684916	52875388	L27
	rs60642411	17	29390671	A	G	17q11.2	0.140168	0.04628	0.00777284	2.61569e-09	ncRNA_intronic	RP11-848P1.9	1.89	5	T1L28	29390169	29390671	L28
	rs112972619	17	43776425	T	C	17q21.31	0.218102	-0.0447276	0.00648609	5.35175e-12	ncRNA_intronic	CRHR1:RP11-105N13.4	0.176	6	T1L29	43475929	44865498	L29
	rs199491	17	44515243	T	C	17q21.31	0.235921	-0.0460773	0.00660193	2.96516e-12	ncRNA_intronic	NSFP1	2.259	5
	rs17820301	17	53872849	G	A	17q22	0.015457	-0.129363	0.021686	2.44217e-09	intronic	PCTP	19.4	5	T1L30	53872849	53872849	L30
	rs6088801	20	33942261	A	G	20q11.22	0.631575	-0.0382045	0.00553571	5.14671e-12	intronic	UQCC1	0.839	5	T1L31	33888741	34026138	L31
	rs6020556	20	49115218	A	T	20q13.13	0.392783	-0.0396568	0.00550621	5.92449e-13	intergenic	PTPN1	1.955	5	T1L32	49113657	49205492	L32
	rs12479469	20	61145196	A	G	20q13.33	0.336149	-0.0466984	0.00587191	1.82288e-15	ncRNA_exonic	C20orf166-AS1	0.826	NA	T1L33	61141981	61158050	L33
	rs28368435	22	46406695	G	A	22q13.31	0.617324	-0.033882	0.0054917	6.84328e-10	intergenic	CITF22-92A6.1	0.064	5	T1L34	46400860	46408879	L34
	rs2885287	X	68377499	A	G	Xq13.1	0.237961	-0.0304819	0.00520273	4.66166e-09	intergenic	PJA1	3.898	NA	T1L35	68377126	68377499	L35
Medulla absolute volume	rs72853807	1	7730879	T	C	1p36.23	0.0609378	0.0626643	0.0105592	2.94587e-09	intronic	CAMTA1	4.755	5	T2L1	7715343	7801288	L36
	rs75630480	1	7765320	G	C	1p36.23	0.197569	-0.0431708	0.00640389	1.56929e-11	intronic	CAMTA1	3.271	4
	rs12996313	2	200997916	T	C	2q33.1	0.201312	-0.0399351	0.00630468	2.38581e-10	intergenic	C2orf47	0.318	6	T2L2	200680999	201108181	L37
	rs2372958	2	217927074	G	A	2q35	0.208915	-0.0474345	0.00625288	3.2987e-14	intergenic	RP11-574O16.1	3.315	5	T2L3	217858525	217940670	L38
	rs7619231	3	27989316	G	A	3p24.1	0.356916	-0.0311557	0.00532757	4.97493e-09	intergenic	AC092415.1	1.841	7	T2L4	27989316	27989316	L39
	rs13177756	5	64875004	G	A	5q12.3	0.255463	0.056922	0.00579411	8.86558e-23	intronic	PPWD1	3.648	6	T2L5	64779214	65080091	L13
	rs2153960	6	108988184	A	G	6q21	0.708954	0.0467159	0.00550817	2.22904e-17	intronic	FOXO3	7.289	4	T2L6	108861264	109020332	L16
	rs1268066	6	126035041	T	C	6q22.31	0.36301	0.0456222	0.00529513	6.94006e-18	ncRNA_intronic	RP11-624M8.1:RP1-293L8.2	2.451	4	T2L7	125893304	126258619	L40
	rs12523793	6	149973764	A	G	6q25.1	0.33126	0.0366019	0.00537019	9.3765e-12	intergenic	KATNA1	1.657	7	T2L8	149874899	150179223	L17
	rs42039	7	92244422	T	C	7q21.2	0.242269	0.0351029	0.00593805	3.3896e-09	UTR3	CDK6	1.244	5	T2L9	92244422	92263789	L41
	rs1693560	8	101680292	G	A	8q22.3	0.464007	0.030454	0.00508683	2.13971e-09	intergenic	SNX31	3.27	2b	T2L10	101673922	101681163	L42
	rs10983068	9	118918479	T	C	9q33.1	0.611941	-0.0388103	0.00522141	1.06226e-13	intronic	PAPPA	12.33	5	T2L11	118917007	119098518	L22
	rs72754248	9	119061396	A	G	9q33.1	0.0701759	0.0629785	0.00987148	1.77276e-10	ncRNA_intronic	PAPPA:RP11-45A16.4	13.23	4
	rs369508364	9	125696599	T	C	9q33.2	0.00559268	-0.292723	0.0339631	6.76248e-18	intergenic	ZBTB26	0.248	6	T2L12	125550272	126120655	L43
	rs1485995	11	69307707	A	G	11q13.3	0.671467	-0.0336271	0.00541398	5.25939e-10	intergenic	AP000439.3	0.127	1b	T2L13	69307707	69307707	L24
	rs562059	11	118602058	T	G	11q23.3	0.642249	0.0320016	0.00528684	1.42113e-09	ncRNA_intronic	AP002954.4	0.052	7	T2L14	118570183	118739395	L44
	rs7308095	12	50604121	T	G	12q13.12	0.34835	0.0316359	0.00526328	1.84741e-09	intronic	LIMA1	1.474	7	T2L15	50584317	51211775	L45
	rs1047912	12	51138862	T	C	12q13.12	0.301775	0.0351686	0.00547559	1.33794e-10	UTR3	DIP2B	13.97	1f
	rs181969742	12	102828076	A	C	12q23.2	0.0369018	-0.0789655	0.013483	4.72226e-09	intronic	IGF1	0.969	6
	rs11111293	12	102921296	C	T	12q23.2	0.220734	0.0411606	0.00606764	1.17197e-11	intergenic	RP11-210L7.1	19.36	2b	T2L16	102409334	102942969	L25
	rs10861650	12	107097836	C	A	12q23.3	0.346196	0.0329288	0.00530475	5.38589e-10	intronic	RP11-144F15.1:RFX4	0.283	6	T2L17	107052620	107239947	L26
	rs55718582	15	78558170	C	T	15q25.1	0.422918	-0.0300212	0.00510674	4.13402e-09	UTR3	DNAJA4	10.07	5	T2L18	78536260	78560927	L46
	rs8034564	15	99190601	A	G	15q26.3	0.582043	-0.0325428	0.0051776	3.27195e-10	upstream	RP11-35O15.1	4.88	4	T2L19	99177652	99193276	L47
	rs1363119	19	18444809	G	A	19p13.11	0.54942	0.0361159	0.00510559	1.50748e-12	downstream	RN7SL513P	0.712	3a	T2L20	18412615	18471610	L48
	rs10422762	19	36157167	A	G	19q13.12	0.474148	-0.0294814	0.00504049	4.94767e-09	upstream	UPK1A	0.002	4	T2L21	36157167	36208693	L49
	rs12479469	20	61145196	A	G	20q13.33	0.336169	-0.0342317	0.00554243	6.56236e-10	ncRNA_exonic	C20orf166-AS1	0.826	1b	T2L22	61145196	61145196	L33
	rs7067170	X	68382836	A	G	Xq13.1	0.234673	-0.0360587	0.00492461	2.44046e-13	exonic (synonymous)	PJA1	0.959	5	T2L23	68354618	68384580	L35
Medulla relative volume	rs4951159	1	205012106	C	G	1q32.1	0.914901	-0.0376474	0.0058917	1.65993e-10	upstream	CNTN2	0.16	4	T3L1	205012106	205205651	L50
	rs17010085	3	72708844	C	G	3p13	0.203884	0.0255631	0.00403009	2.25254e-10	intergenic	RNA5SP136	1.274	4	T3L2	72708844	72709061	L51
	rs4396983	4	15132604	A	G	4p15.33	0.445043	0.0193418	0.0032798	3.69639e-09	ncRNA_intronic	RP11-665G4.1	2.745	4	T3L3	15113626	15143018	L9
	rs13328187	5	87865365	C	T	5q14.3	0.252954	0.0236282	0.00373768	2.58828e-10	ncRNA_intronic	LINC00461	5.957	5	T3L4	87839003	87929869	L52
	rs9505293	6	7870593	T	G	6p24.3	0.108742	-0.0321154	0.00525009	9.52928e-10	intronic	BMP6	0.713	6	T3L5	7864764	7887670	L15
	rs1777220	6	126022602	T	G	6q22.31	0.385748	0.0304244	0.0033844	2.48136e-19	ncRNA_intronic	RP11-624M8.1:RP1-293L8.2	6.933	5	T3L6	125908606	126228535	L40
	rs9403408	6	143166001	G	A	6q24.2	0.282032	0.0218638	0.00363527	1.80598e-09	intronic	HIVEP2	4.262	3a	T3L7	143146424	143192754	L53
	rs76928645	7	54941328	T	C	7p11.2	0.101205	-0.0385822	0.00541627	1.05306e-12	intergenic	SNORA73	11.09	6	T3L8	54920906	54966738	L20
	rs17784801	8	23689495	A	T	8p21.2	0.189524	-0.0248715	0.00417388	2.54035e-09	intergenic	STC1	1.044	7	T3L9	23686944	23694424	L54
	rs2032996	9	21168784	G	A	9p21.3	0.435836	-0.0200029	0.00327556	1.01697e-09	intergenic	IFNA21	1.983	7	T3L10	21157373	21197502	L55
	rs803903	9	119434290	G	A	9q33.1	0.675667	-0.0224118	0.00348401	1.25312e-10	intronic	ASTN2	10.22	4	T3L11	119264420	119482839	L22
	rs369508364	9	125696599	T	C	9q33.2	0.00559268	-0.135591	0.0219017	5.98317e-10	intergenic	ZBTB26	0.248	6	T3L12	125696599	125696599	L43
	rs148739452	12	102099649	G	A	12q23.2	0.151873	-0.0291729	0.0047118	5.96067e-10	intronic	CHPT1	2.167	5	T3L13	102094493	102901002	L25
	rs111883632	12	102323450	T	C	12q23.2	0.0954997	-0.0350844	0.00560202	3.7809e-10	intronic	DRAM1	0.402	2b
	rs11111088	12	102324872	C	T	12q23.2	0.481315	0.044773	0.00329158	3.88205e-42	intronic	DRAM1	2.143	5
	rs17032214	12	102397528	C	T	12q23.2	0.0130769	-0.0899086	0.0143645	3.87264e-10	intronic	DRAM1	19.34	5
	rs80028338	17	44161470	C	A	17q21.31	0.183216	0.0259638	0.00439583	3.49537e-09	intronic	KANSL1	0.496	7	T3L14	43489161	44857126	L29
	rs7503584	17	46055036	A	G	17q21.32	0.208841	0.0249931	0.00401392	4.76665e-10	intronic	CDK5RAP3	7.949	1f
	rs8067216	17	46088197	A	G	17q21.32	0.292182	-0.0260509	0.00360014	4.61823e-13	intergenic	RP11-6N17.10	0.214	6
	rs999493	17	46625519	A	G	17q21.32	0.623599	-0.0251142	0.00340174	1.55063e-13	ncRNA_intronic	HOXB-AS1	19.79	3a	T3L15	45951250	46776341	L29
	rs16973299	18	38004201	A	G	18q12.3	0.175813	-0.0274496	0.00426519	1.2288e-10	intergenic	RNU7-145P	0.047	7	T3L16	38001132	38011902	L56
	rs1857731	18	49177965	G	A	18q21.2	0.61933	-0.0216649	0.00336275	1.17447e-10	intergenic	RP11-440L16.1	2.635	5	T3L17	49162801	49179151	L57
	rs35343344	19	18471610	A	C	19p13.11	0.263738	0.0238206	0.0037883	3.21685e-10	intronic	PGPEP1	3.995	6	T3L18	18423238	18471610	L48
Pons absolute volume	rs3789586	1	51054322	T	C	1p32.3	0.150303	0.0513594	0.00792405	9.08363e-11	intronic	FAF1	3.193	7	T4L1	50828316	51478502	L1
	rs6593920	1	205037676	G	T	1q32.1	0.459673	0.0373785	0.00566511	4.16676e-11	intronic	CNTN2	1.19	1f	T4L2	205023014	205265370	L50
	rs2369633	1	205181062	C	T	1q32.1	0.909306	0.0593303	0.00986028	1.77566e-09	upstream	DSTYK	5.491	1b
	rs55795022	2	16386265	A	T	2p24.3	0.172294	-0.05489	0.00850528	1.09201e-10	downstream	AC010745.1	16.11	5	T4L3	16386265	16629316	L2
	rs115581765	2	16420800	C	T	2p24.3	0.0481862	0.0819362	0.0134587	1.14339e-09	intergenic	GACAT3	2.906	4
	rs1560368	2	16604293	C	T	2p24.3	0.808703	0.0529689	0.00723126	2.38911e-13	ncRNA_intronic	AC010880.1	5.564	5
	rs13388394	2	33764176	G	A	2p22.3	0.0415766	0.0942605	0.0141898	3.07712e-11	exonic (missense)	RASGRP3	17.72	7	T4L4	33764176	33764176	L3
	rs1805165	2	88874891	A	C	2p11.2	0.71781	-0.04441	0.00626722	1.37969e-12	exonic (missense)	EIF2AK3	16.6	1f	T4L5	88870632	89103554	L4
	rs1063657	2	177017871	T	C	2q31.1	0.205776	0.0484734	0.00706271	6.7291e-12	UTR3	HOXD4	11.61	2b	T4L6	176978383	177233379	L5
	rs72929103	2	177047172	A	C	2q31.1	0.0368025	-0.112364	0.0150053	6.97922e-14	ncRNA_intronic	HOXD-AS1	0.211	7
	rs7426128	2	223009027	T	A	2q36.1	0.098156	-0.0560569	0.00952577	3.98626e-09	intergenic	PAX3	3.917	7	T4L7	222987099	223164518	L6
	rs2234675	2	223085955	T	G	2q36.1	0.0424331	-0.0890256	0.013996	2.0075e-10	exonic (missense)	PAX3	25.2	5
	rs12470153	2	223155911	C	G	2q36.1	0.66262	-0.0390638	0.00610989	1.62087e-10	intronic	PAX3	10.86	2b
	rs16863657	2	223164518	G	A	2q36.1	0.123548	-0.0710303	0.00879567	6.71506e-16	intronic	CCDC140	4.904	4
	rs78094954	3	69881136	A	G	3p13	0.215602	0.0411652	0.00689803	2.40659e-09	intronic	MITF	0.959	7	T4L8	69815329	69906503	L7
	rs17010085	3	72708844	C	G	3p13	0.203867	-0.0519152	0.00700376	1.2397e-13	intergenic	RNA5SP136	1.274	4	T4L9	72708844	72709792	L51
	rs6444749	3	193546238	C	T	3q29	0.40912	0.0521989	0.00574661	1.05216e-19	intergenic	RP11-528A4.2	4.423	4	T4L10	193515781	193575458	L8
	rs13136309	4	15134596	C	T	4p15.33	0.392237	-0.0419509	0.00585429	7.73161e-13	ncRNA_intronic	RP11-665G4.1	5.315	4	T4L11	14988889	15190356	L9
	rs10027331	4	15149569	A	G	4p15.33	0.249867	-0.0640083	0.00651206	8.42875e-23	ncRNA_intronic	RP11-665G4.1	5.293	4
	rs2703156	4	77938810	C	T	4q21.1	0.608507	-0.0348483	0.00584851	2.54587e-09	intronic	SEPT11	5.21	1f	T4L12	77885451	77938885	L10
	rs2231142	4	89052323	T	G	4q22.1	0.114845	-0.0589032	0.00882787	2.51619e-11	exonic (stop gain)	ABCG2	22.3	1f	T4L13	89039082	89054667	L11
	rs2935620	5	2685567	A	G	5p15.33	0.345023	0.040154	0.00596327	1.65573e-11	intergenic	RP11-129I19.2	0.011	6	T4L14	2670593	2685567	L58
	rs16894165	5	64944734	C	A	5q12.3	0.254593	0.0555232	0.00650569	1.40687e-17	intronic	TRAPPC13	5.941	6	T4L15	64779214	65083148	L13
	rs2591928	5	65040267	G	A	5q12.3	0.25186	-0.0393747	0.00653469	1.68589e-09	intronic	NLN	0.955	5
	rs72829213	6	7864764	T	C	6p24.3	0.0902193	0.0904896	0.00989486	5.95645e-20	intronic	BMP6	0.181	5	T4L16	7861317	7907884	L15
	rs2153960	6	108988184	A	G	6q21	0.70895	0.0577639	0.00617296	8.15924e-21	intronic	FOXO3	7.289	4	T4L17	108861264	109020332	L16
	rs12523793	6	149973764	A	G	6q25.1	0.331217	0.0444712	0.00601815	1.47378e-13	intergenic	KATNA1	1.657	7	T4L18	149874899	150180259	L17
	rs73027873	6	158654010	T	C	6q25.3	0.143986	-0.0472326	0.0080778	4.99887e-09	intergenic	SRP72P2	14.46	2b	T4L19	158654010	158744991	L59
	rs17136348	7	6074709	G	T	7p22.1	0.0427119	0.0907732	0.0139823	8.47109e-11	intronic	EIF2AK1:ANKRD61	3.404	7	T4L20	6035948	6116937	L18
	rs12536500	7	50808033	C	T	7p12.1	0.749105	0.0426142	0.00651913	6.28548e-11	intronic	GRB10	7.681	4	T4L21	50701406	50876001	L19
	rs151057105	7	54944920	T	C	7p11.2	0.0918359	0.057765	0.00981121	3.91733e-09	intergenic	SNORA73	0.322	6
	rs9642564	7	55145334	A	G	7p11.2	0.254731	-0.0392618	0.00650234	1.55933e-09	intronic	EGFR	6.411	4
	rs940808	7	55279470	C	G	7p11.2	0.260961	-0.0399452	0.00648244	7.18028e-10	intronic	EGFR	0.439	5	T4L22	54941328	55279470	L20
	rs2721948	8	116643338	T	C	8q23.3	0.602624	0.0357968	0.00578331	6.02891e-10	intronic	TRPS1	0.461	5	T4L23	116592145	116644121	L60
	rs2173537	8	129047325	A	G	8q24.21	0.160302	-0.0570818	0.00805289	1.35711e-12	ncRNA_intronic	PVT1	8.187	4	T4L24	129047325	129047325	L61
	rs7043476	9	14463450	T	C	9p22.3	0.714655	0.0445725	0.00624115	9.21748e-13	intergenic	NFIB	3.302	6	T4L25	14438035	14529623	L62
	rs985223	9	118935817	A	G	9q33.1	0.612592	-0.0723932	0.00583182	2.20844e-35	intronic	PAPPA	1.769	6	T4L26	118917007	119447750	L22
	rs62574179	9	118970563	G	A	9q33.1	0.0573852	0.0912519	0.0122519	9.47835e-14	intronic	PAPPA	7.15	6
	rs10983236	9	119330060	G	T	9q33.1	0.45234	0.0376693	0.00568313	3.39654e-11	intronic	ASTN2	4.828	5
	rs7929999	11	10470440	C	G	11p15.4	0.46624	-0.0357787	0.00570828	3.66049e-10	intronic	AMPD3	0.657	3a	T4L27	10459722	10481956	L63
	rs10792029	11	68966882	G	A	11q13.3	0.964882	0.0924253	0.015276	1.44536e-09	intergenic	RP11-554A11.8	5.597	4	T4L28	68966882	69510653	L24
	rs61881112	11	68988174	G	A	11q13.3	0.0792791	0.0626913	0.0104579	2.03914e-09	intergenic	RP11-554A11.8	3.493	4
	rs12788188	11	69003581	A	T	11q13.3	0.500878	0.0567672	0.00571555	3.01976e-23	intergenic	MYEOV	0.466	6
	rs1789166	11	69482091	A	C	11q13.3	0.645619	0.0388989	0.00592602	5.23559e-11	UTR3	ORAOV1	0.432	4
	rs10492086	12	102187941	G	A	12q23.2	0.178448	0.049742	0.00741621	1.98386e-11	intronic	GNPTAB	8.042	7	T4L29	102080847	102946220	L25
	rs111883632	12	102323450	T	C	12q23.2	0.0954772	0.0602376	0.00973618	6.13237e-10	intronic	DRAM1	0.402	2b
	rs11111090	12	102326461	C	A	12q23.2	0.481429	-0.0970062	0.00567142	1.37674e-65	intronic	DRAM1	3.741	5
	rs76666326	12	102331923	T	G	12q23.2	0.0828695	0.0628957	0.0103014	1.02444e-09	intronic	DRAM1	5.792	5
	rs4313630	12	102335984	C	G	12q23.2	0.0514866	-0.0852004	0.0129669	5.01063e-11	intronic	DRAM1	7.613	4
	rs7971939	12	102407432	T	A	12q23.2	0.217906	0.0696297	0.00685962	3.29147e-24	intronic	CCDC53	0.705	6
	rs11111293	12	102921296	C	T	12q23.2	0.220757	0.0652479	0.0067993	8.28862e-22	intergenic	RP11-210L7.1	19.36	2b
	rs10861640	12	107032045	C	G	12q23.3	0.147421	0.0750731	0.00801148	7.20586e-21	intronic	RP11-144F15.1:RFX4	1.329	7	T4L30	106685848	107522203	L26
	rs7307895	12	107332126	C	A	12q23.3	0.429019	0.039362	0.00571646	5.74914e-12	intergenic	RP11-412D9.4	0.341	6
	rs11644675	16	52813601	A	G	16q12.2	0.431754	0.0521858	0.00571869	7.14238e-20	intergenic	RP11-297L17.6	12.39	4	T4L31	52684916	52875388	L27
	rs60642411	17	29390671	A	G	17q11.2	0.140178	0.0492734	0.00822218	2.06342e-09	ncRNA_intronic	RP11-848P1.9	1.89	5	T4L32	29389026	29509946	L28
	rs17688916	17	43778680	A	T	17q21.31	0.192961	-0.0466413	0.00733766	2.06506e-10	ncRNA_intronic	CRHR1:RP11-105N13.4	8.331	1f	T4L33	43489161	44863133	L29
	rs2696550	17	44349290	G	C	17q21.31	0.179279	-0.0504422	0.00774401	7.33203e-11	intergenic	ARL17B	3.692	6
	rs916888	17	44863133	C	T	17q21.31	0.245781	-0.0416292	0.00654842	2.05535e-10	intronic	WNT3	7.991	1f
	rs1123630	17	46671816	A	G	17q21.32	0.174309	-0.0492034	0.00747238	4.55781e-11	ncRNA_intronic	HOXB3:HOXB-AS3:HOXB6	8.673	1f	T4L34	46564225	46732136	L29
	rs17820301	17	53872849	G	A	17q22	0.0154596	-0.16208	0.0229385	1.59629e-12	intronic	PCTP	19.4	5	T4L35	53872849	53872849	L30
	rs6088801	20	33942261	A	G	20q11.22	0.631527	-0.0409821	0.0058559	2.58832e-12	intronic	UQCC1	0.839	5	T4L36	33888741	34026138	L31
	rs6095988	20	49124561	C	G	20q13.13	0.378552	-0.043146	0.00586175	1.83078e-13	intergenic	PTPN1	1.013	6	T4L37	49113657	49205492	L32
	rs12479469	20	61145196	A	G	20q13.33	0.336164	-0.0445496	0.00621138	7.37737e-13	ncRNA_exonic	C20orf166-AS1	0.826	1b	T4L38	61141981	61155088	L33
	rs28368435	22	46406695	G	A	22q13.31	0.617344	-0.040496	0.00580926	3.14827e-12	intergenic	CITF22-92A6.1	0.064	5	T4L39	46400860	46409177	L34
	rs4893075	X	154429214	G	A	Xq28	0.265391	-0.0315893	0.00541066	5.27237e-09	intronic	VBP1	4.07	1f	T4L40	154429214	154949953	L64
Pons relative volume	rs733813	1	18907484	G	A	1p36.13	0.487896	-0.00743704	0.00119792	5.3565e-10	intergenic	RP1-8B22.2	2.756	4	T5L1	18905366	18960722	L65
	rs2764839	1	42368704	G	A	1p34.2	0.640995	-0.00853606	0.00123962	5.73704e-12	intronic	HIVEP3	5.111	1b	T5L2	42288685	42624442	L66
	rs4951159	1	205012106	C	G	1q32.1	0.914894	0.0164327	0.00216584	3.26883e-14	upstream	CNTN2	0.16	4	T5L3	204988535	205297880	L50
	rs6593920	1	205037676	G	T	1q32.1	0.459673	0.0080288	0.00119839	2.08925e-11	intronic	CNTN2	1.19	1f
	rs112301787	2	16426142	G	T	2p24.3	0.0631428	0.0175096	0.00244704	8.34124e-13	intergenic	AC010745.2	2.041	5	T5L4	16420389	16617417	L2
	rs11096549	2	16607101	T	C	2p24.3	0.719991	0.0092409	0.00133474	4.40964e-12	ncRNA_intronic	AC010880.1	16.76	4
	rs847164	2	176992444	T	C	2q31.1	0.0720309	-0.0138042	0.00233093	3.17651e-09	ncRNA_intronic	HOXD-AS2	2.085	2b	T5L5	176992444	177028841	L5
	rs16863657	2	223164518	G	A	2q36.1	0.123548	-0.0130363	0.00186063	2.44513e-12	intronic	CCDC140	4.904	4	T5L6	223164518	223164518	L6
	rs17010085	3	72708844	C	G	3p13	0.203867	-0.0112308	0.00148157	3.44653e-14	intergenic	RNA5SP136	1.274	4	T5L7	72704223	72709792	L51
	rs6849711	4	15150488	T	C	4p15.33	0.248393	-0.0099301	0.00138322	7.02346e-13	ncRNA_intronic	RP11-665G4.1	7.633	5	T5L8	15143018	15151366	L9
	rs116818968	5	2538791	C	A	5p15.33	0.017987	0.0280452	0.00451433	5.2153e-10	intergenic	RP11-129I19.2	5.988	5	T5L9	2538791	2687755	L58
	rs13170001	5	2685550	T	C	5p15.33	0.34466	0.00827408	0.00126101	5.32819e-11	intergenic	RP11-129I19.2	1.928	6
	rs3799534	6	7868368	C	T	6p24.3	0.0900389	0.0152329	0.00209559	3.62081e-13	intronic	BMP6	11.54	7	T5L10	7839124	7898147	L15
	rs9265070	6	31286643	A	G	6p21.33	0.564021	-0.00849031	0.0013627	4.64993e-10	intergenic	LINC02571	0.986	7	T5L11	31284136	31457049	L67
	rs2523698	6	31453884	T	G	6p21.33	0.29255	-0.00860773	0.00133427	1.10932e-10	ncRNA_intronic	MICB-DT	4.562	1f
	rs4470841	6	55319000	T	G	6p12.1	0.270087	-0.0083052	0.00135732	9.42777e-10	intronic	HMGCLL1	2.626	6	T5L12	55307278	55319000	L68
	rs606599	6	100123514	A	G	6q16.2	0.619519	0.00948855	0.00123842	1.83334e-14	intergenic	Y_RNA	0.583	6	T5L13	99903118	100258075	L69
	rs12213228	6	109369169	G	A	6q21	0.111597	-0.0112173	0.00192001	5.14861e-09	intronic	SESN1	2.446	7	T5L14	109290606	109495137	L16
	rs1268066	6	126035041	T	C	6q22.31	0.363007	-0.0103574	0.00125532	1.57306e-16	ncRNA_intronic	RP11-624M8.1:RP1-293L8.2	2.451	4	T5L15	125985540	126254864	L40
	rs1909457	8	129031617	C	T	8q24.21	0.371689	0.00776148	0.00125548	6.32638e-10	ncRNA_intronic	PVT1	3.506	4	T5L16	129031617	129047325	L61
	rs2173537	8	129047325	A	G	8q24.21	0.160302	-0.0117201	0.0017035	5.98514e-12	ncRNA_intronic	PVT1	8.187	4
	rs192769	9	14466057	C	T	9p22.3	0.793058	0.0107045	0.00147629	4.13895e-13	intergenic	RP11-408A13.2	0.08	4	T5L17	14438035	14757877	L62
	rs7864052	9	14757877	C	A	9p22.3	0.433794	-0.00751561	0.00122961	9.82793e-10	intronic	FREM1	11.44	7
	rs564	9	96328303	C	T	9q22.31	0.340846	-0.00850682	0.001269	2.03391e-11	UTR3	FAM120A	17.04	2b	T5L18	96181075	96378933	L70
	rs811458	9	119405271	C	T	9q33.1	0.685553	0.0111272	0.00129146	6.9352e-18	intronic	ASTN2	4.455	7	T5L19	119261166	119487475	L22
	rs369508364	9	125696599	T	C	9q33.2	0.00559221	0.0581173	0.00805183	5.27956e-13	intergenic	ZBTB26	0.248	6	T5L20	125694309	125696599	L43
	rs9667638	11	69004339	A	T	11q13.3	0.50605	0.00934349	0.00120089	7.22368e-15	intergenic	MYEOV	3.115	6	T5L21	68972524	69025799	L24
	rs61881141	11	69017347	G	C	11q13.3	0.0849099	0.0125954	0.00214986	4.66484e-09	intergenic	MYEOV	8.983	4
	rs73317036	12	54502283	G	A	12q13.13	0.0795866	-0.0129501	0.00220395	4.20624e-09	ncRNA_intronic	RP11-834C11.3:RP11-834C11.5	1.953	7	T5L22	54491637	54502283	L71
	rs78079939	12	97862986	A	T	12q23.1	0.187574	-0.00893702	0.00153257	5.4962e-09	ncRNA_intronic	RMST	1.037	6	T5L23	97850735	97868510	L72
	rs12579890	12	102094578	C	G	12q23.2	0.150374	0.0104873	0.00168413	4.75054e-10	intronic	CHPT1	0.161	4	T5L24	102080847	102859649	L25
	rs10492086	12	102187941	G	A	12q23.2	0.178448	0.0118249	0.00156882	4.79125e-14	intronic	GNPTAB	8.042	7
	rs111883632	12	102323450	T	C	12q23.2	0.0954772	0.0141777	0.00205958	5.82957e-12	intronic	DRAM1	0.402	2b
	rs11111090	12	102326461	C	A	12q23.2	0.481429	-0.021055	0.00119973	5.97195e-69	intronic	DRAM1	3.741	5
	rs7971939	12	102407432	T	A	12q23.2	0.217906	0.0107036	0.00145108	1.6274e-13	intronic	CCDC53	0.705	6
	rs11611815	12	106749608	C	A	12q23.3	0.233219	0.0082807	0.00141922	5.38899e-09	intergenic	POLR3B	1.898	7	T5L25	106739439	106927635	L26
	rs12905392	15	99199212	A	G	15q26.3	0.387135	0.00737818	0.00123963	2.65048e-09	intronic	IGF1R	0.081	6	T5L26	99179767	99203496	L47
	rs4783784	16	52815120	T	C	16q12.2	0.42693	0.010552	0.00121104	2.9552e-18	intergenic	RP11-297L17.6	3.432	3b	T5L27	52802761	52917272	L27
	rs9908969	17	30607423	C	T	17q11.2	0.276287	-0.00786416	0.0013406	4.46051e-09	ncRNA_exonic	RHBDL3:RP11-443G13.2	6.082	2b	T5L28	30591265	30607423	L73
	rs4794333	17	46045495	C	T	17q21.32	0.405835	0.00793181	0.00122315	8.88822e-11	ncRNA_intronic	RP11-6N17.9:CDK5RAP3	9.744	4	T5L29	46010893	46775005	L29
	rs8438	17	46147945	A	G	17q21.32	0.247158	-0.0109869	0.00138762	2.41805e-15	UTR3	CBX1	3.77	1f
	rs34490194	17	46648744	T	C	17q21.32	0.194001	-0.0136393	0.00151909	2.74258e-19	ncRNA_intronic	HOXB3:HOXB-AS3	9.245	4
	rs11877758	18	35138110	G	T	18q12.2	0.306584	0.00838909	0.00130314	1.21369e-10	intronic	CELF4	2.718	7	T5L30	35127427	35181176	L74
	rs16973299	18	38004201	A	G	18q12.3	0.175798	0.0138575	0.001568	9.77669e-19	intergenic	RNU7-145P	0.047	7	T5L31	37941245	38013622	L56
	rs6046627	20	20086530	G	A	20p11.23	0.730277	-0.00826405	0.00136977	1.60787e-09	intronic	C20orf26	0.303	6	T5L32	20071634	20086530	L75
Midbrain absolute volume	rs376609228	2	33764579	G	A	2p22.3	0.153729	0.0416901	0.00677784	7.70198e-10	intronic	RASGRP3	3.766	5	T6L1	33740855	33768347	L3
	rs16893969	5	64858889	A	C	5q12.3	0.254739	0.0521394	0.00561575	1.62457e-20	intronic	CENPK	8.758	1c	T6L2	64779214	65080091	L13
	rs2591928	5	65040267	G	A	5q12.3	0.251846	-0.0333266	0.00564273	3.50246e-09	intronic	NLN	0.955	5
	rs115764052	5	118566243	T	C	5q23.1	0.0355928	-0.0810233	0.0131738	7.73282e-10	intronic	DMXL1	0.076	6	T6L3	118566243	118598999	L14
	rs249616	5	139529656	T	C	5q31.3	0.512309	0.0315625	0.00496121	1.99323e-10	intergenic	CTB-131B5.5	4.73	5	T6L4	139517197	139690103	L76
	rs2153960	6	108988184	A	G	6q21	0.708952	0.0495407	0.00533039	1.48576e-20	intronic	FOXO3	7.289	4	T6L5	108857876	109020332	L16
	rs12523793	6	149973764	A	G	6q25.1	0.331227	0.03941	0.00519676	3.3614e-14	intergenic	KATNA1	1.657	7	T6L6	149871422	150247076	L17
	rs151057105	7	54944920	T	C	7p11.2	0.0918307	0.0877919	0.00847213	3.67501e-25	intergenic	SNORA73	0.322	6	T6L7	54909928	55279470	L20
	rs9642564	7	55145334	A	G	7p11.2	0.254731	-0.0355498	0.0056148	2.42859e-10	intronic	EGFR	6.411	4
	rs6593211	7	55277964	A	G	7p11.2	0.26453	-0.0353931	0.00554835	1.78223e-10	UTR3	EGFR	0.071	6
	rs142426754	7	99725210	T	G	7q22.1	0.0481513	-0.0666577	0.0114285	5.45758e-09	exonic (synonymous)	MBLAC1	9.991	3a	T6L8	99725210	99725210	L21
	rs718766	7	121025502	C	T	7q31.31	0.274663	-0.037608	0.00547369	6.38963e-12	intronic	FAM3C	0.671	6	T6L9	120965464	121040782	L77
	rs1693560	8	101680292	G	A	8q22.3	0.464012	0.0373418	0.00492256	3.30326e-14	intergenic	SNX31	3.27	2b	T6L10	101673265	101685694	L42
	rs1160248	9	118944239	T	C	9q33.1	0.614921	-0.0423287	0.00504312	4.72489e-17	intronic	PAPPA	7.023	5	T6L11	118917007	119001088	L22
	rs62574179	9	118970563	G	A	9q33.1	0.057382	0.0680079	0.0105797	1.29179e-10	intronic	PAPPA	7.15	6
	rs369508364	9	125696599	T	C	9q33.2	0.00559189	-0.223322	0.0328682	1.08707e-11	intergenic	ZBTB26	0.248	6	T6L12	125696599	125696599	L43
	rs10786333	10	99090390	G	A	10q24.1	0.401758	-0.0321363	0.00500172	1.31826e-10	intergenic	FRAT2	3.421	7	T6L13	98973815	99099397	L23
	rs11605232	11	10468501	C	T	11p15.4	0.465541	-0.0327105	0.00494635	3.76453e-11	intronic	AMPD3	0.093	6	T6L14	10458596	10491741	L63
	rs11111088	12	102324872	C	T	12q23.2	0.481332	-0.034168	0.00493928	4.59317e-12	intronic	DRAM1	2.143	5	T6L15	102324872	102338295	L25
	rs2273171	14	31381351	C	T	14q12	0.476426	0.0313482	0.00488402	1.3761e-10	exonic (missense)	STRN3	22.4	7	T6L16	31366715	31505048	L78
	rs184867122	14	53766575	C	A	14q22.1	0.263495	-0.0342214	0.00567514	1.63899e-09	ncRNA_intronic	AL163953.3	0.945	7	T6L17	53714999	53790920	L79
	rs7402982	15	99193269	G	A	15q26.3	0.584157	-0.0329166	0.00509883	1.07713e-10	intronic	IGF1R	7.74	4	T6L18	99177652	99193276	L47
	rs56100710	17	43939395	T	A	17q21.31	0.210552	-0.0421268	0.00606265	3.68996e-12	ncRNA_intronic	MAPT-AS1	4.922	7	T6L19	43489161	44863133	L29
	rs199491	17	44515243	T	C	17q21.31	0.235896	-0.0426312	0.00603101	1.56432e-12	ncRNA_intronic	NSFP1	2.259	5
	rs6095988	20	49124561	C	G	20q13.13	0.378573	-0.0324585	0.00506149	1.42845e-10	intergenic	PTPN1	1.013	6	T6L20	49113657	49205492	L32
	rs12479469	20	61145196	A	G	20q13.33	0.336159	-0.0524107	0.00536355	1.49018e-22	ncRNA_exonic	C20orf166-AS1	0.826	NA	T6L21	61141981	61190367	L33
	rs4969531	20	61161246	G	A	20q13.33	0.626696	0.0313465	0.00513819	1.05617e-09	intronic	C20orf166	2.632	NA
	rs5937157	X	68377126	G	T	Xq13.1	0.237695	-0.0321753	0.00476562	1.46292e-11	intergenic	PJA1	3.408	6	T6L22	68354618	68382836	L35
Midbrain relative volume	rs517246	1	244448513	A	C	1q44	0.0915895	0.0391808	0.00448446	2.39352e-18	intergenic	C1orf100	21.4	5	T7L1	244448353	244450406	L80
	rs55795022	2	16386265	A	T	2p24.3	0.1723	0.027024	0.00370537	3.02642e-13	downstream	AC010745.1	16.11	5	T7L2	16386265	16457697	L2
	rs116784386	2	16457697	C	G	2p24.3	0.0660801	-0.0295848	0.00495528	2.36743e-09	intergenic	AC010745.4	0.008	7
	rs1431071	2	226353554	T	G	2q36.3	0.293826	0.0169931	0.00270705	3.4437e-10	intronic	NYAP2	5.84	NA	T7L3	226336692	226601173	L81
	rs6740674	2	226471864	T	C	2q36.3	0.664614	0.0159187	0.00260234	9.53142e-10	intronic	NYAP2	3.913	7
	rs12500531	4	23725345	A	G	4p15.2	0.177916	0.0195289	0.00323409	1.5558e-09	ncRNA_intronic	RP11-380P13.1:RP11-380P13.2	2.342	7	T7L4	23725345	23757308	L82
	rs13170001	5	2685550	T	C	5p15.33	0.344669	-0.0155523	0.00259706	2.11914e-09	intergenic	RP11-129I19.2	1.928	6	T7L5	2683885	2685567	L58
	rs62446652	7	19549163	C	G	7p21.1	0.179943	0.0189671	0.00322944	4.27495e-09	ncRNA_intronic	AC007091.1	0.03	7	T7L6	19549163	19568504	L83
	rs151057105	7	54944920	T	C	7p11.2	0.0918307	0.041856	0.00427442	1.21624e-22	intergenic	SNORA73	0.322	6	T7L7	54909928	55069628	L20
	rs2173537	8	129047325	A	G	8q24.21	0.160323	0.0227633	0.00350821	8.66518e-11	ncRNA_intronic	PVT1	8.187	4	T7L8	129047325	129047325	L61
	rs192769	9	14466057	C	T	9p22.3	0.793056	-0.0179702	0.00304039	3.41102e-09	intergenic	RP11-408A13.2	0.08	NA	T7L9	14457576	14466057	L62
	rs7118404	11	46908730	A	G	11p11.2	0.660592	0.0166159	0.00262725	2.54145e-10	intronic	LRP4	0.441	5	T7L10	46734805	47242761	L84
	rs2892655	12	32490229	A	T	12p11.21	0.212382	0.0238171	0.00300989	2.51389e-15	intronic	BICD1	0.066	6	T7L11	32455973	32633395	L85
	rs4301837	12	102336310	C	T	12q23.2	0.496941	0.0247122	0.00248832	3.04356e-23	intronic	DRAM1	4.068	5	T7L12	102120974	102922986	L25
	rs1986854	12	102417475	C	T	12q23.2	0.176171	-0.0279591	0.00323138	5.04457e-18	intronic	CCDC53	11.28	2b
	rs11111293	12	102921296	C	T	12q23.2	0.220745	-0.0181249	0.0029622	9.43278e-10	intergenic	RP11-210L7.1	19.36	2b
	rs10138360	14	75293386	A	G	14q24.3	0.536384	-0.015407	0.00246316	3.97602e-10	intronic	YLPM1	5.053	5	T7L13	75190531	75396955	L86
	rs45465998	16	52583410	A	G	16q12.1	0.239258	-0.0182925	0.00288717	2.36124e-10	intergenic	TOX3	0.642	5	T7L14	52563951	52873960	L27
	rs11644675	16	52813601	A	G	16q12.2	0.431772	-0.0176759	0.00249137	1.2947e-12	intergenic	RP11-297L17.6	12.39	4
	rs2365	18	35263298	C	T	18q12.2	0.290239	-0.0170501	0.002727	4.04431e-10	intergenic	RP11-19F9.1	3.11	NA	T7L15	35263298	35278126	L74
	rs9949883	18	37957279	T	C	18q12.3	0.401821	-0.0152803	0.00252222	1.37578e-09	intergenic	RNU7-145P	3.042	7	T7L16	37941245	37974069	L56
	rs6062237	20	61154437	C	T	20q13.33	0.31385	-0.0161298	0.00266415	1.40933e-09	intronic	C20orf166	6.312	NA	T7L17	61150997	61158050	L33
SCP absolute volume	rs1376888	2	237643604	C	T	2q37.3	0.420654	-0.0440943	0.00668811	4.31218e-11	ncRNA_intronic	AC011286.1	3.509	NA	T8L1	237615524	237644199	L87
	rs17773703	3	66380191	G	C	3p14.1	0.257814	0.0444902	0.00760119	4.8263e-09	intronic	SLC25A26	1.22	7	T8L2	66369672	66396898	L88
	rs12500531	4	23725345	A	G	4p15.2	0.177748	0.0569954	0.00867549	5.04141e-11	ncRNA_intronic	RP11-380P13.1:RP11-380P13.2	2.342	7	T8L3	23715876	23848631	L82
	rs2970853	4	23823519	G	A	4p15.2	0.723327	0.0462455	0.00740008	4.12215e-10	intronic	PPARGC1A	1.363	6
	rs16893969	5	64858889	A	C	5q12.3	0.254638	0.0480298	0.00759886	2.60444e-10	intronic	CENPK	8.758	1c	T8L4	64779214	65001061	L13
	rs2153960	6	108988184	A	G	6q21	0.708848	0.0427276	0.00720947	3.09279e-09	intronic	FOXO3	7.289	4	T8L5	108934564	109018292	L16
	rs7030234	9	75826316	A	T	9q21.13	0.297701	-0.0434943	0.00723958	1.88006e-09	intergenic	ANXA1	1.166	5	T8L6	75818300	75849823	L89
	rs17727841	12	102809630	C	G	12q23.2	0.178662	0.0578986	0.00863725	2.03682e-11	intronic	IGF1	0.749	1f	T8L7	102399379	102924964	L25
	rs6062251	20	61162267	C	T	20q13.33	0.62274	0.0404881	0.00692131	4.92237e-09	downstream	MIR133A2	1.238	NA	T8L8	61162267	61179491	L33
SCP relative volume	rs7556982	2	237644199	G	A	2q37.3	0.420821	-0.0463153	0.00601719	1.39119e-14	ncRNA_intronic	AC011286.1	4.769	7	T9L1	237604811	237672388	L87
	rs12500531	4	23725345	A	G	4p15.2	0.177748	0.0494239	0.00780734	2.44451e-10	ncRNA_intronic	RP11-380P13.1:RP11-380P13.2	2.342	7	T9L2	23715876	23846498	L82
	rs2970853	4	23823519	G	A	4p15.2	0.723327	0.0394745	0.00665955	3.07568e-09	intronic	PPARGC1A	1.363	6
	rs10026372	4	57747166	C	T	4q12	0.46591	0.0403452	0.00602575	2.14981e-11	intergenic	REST	0.353	6	T9L3	57744248	57899602	L90
	rs7030234	9	75826316	A	T	9q21.13	0.297701	-0.0447776	0.00651511	6.29208e-12	intergenic	ANXA1	1.166	5	T9L4	75818300	75849823	L89
	rs80100171	17	9151754	A	G	17p13.1	0.17374	0.0471867	0.00787063	2.0313e-09	intergenic	STX8	0.085	7	T9L5	9143458	9155926	L91
Note: TnLm means the mth locus for the nth trait. Ln is the nth LD-independent locus. Abbereviations: A1, effect allele; A2, non-effect allele; CADD, combined annotation-dependent depletion; CHR, chromosome; EAF, effect allele frequency; Nearest Gene, protein-coding gene containing the lead variant or nearest to the lead variant; RDB, RegulomeDB; SE, standard error.

## Sheet: Table S8
Supplementary Table 8. Genetic discovery (P < 5.56 × 10-9) in EUR-GWASs.
Variant-trait association											Variant annotation				Locus-trait association			LD-independent locus
Trait	Variant	CHR	Position	A1	A2	Band	EAF	Beta	SE	P	Location	Nearest gene	CADD	RDB	TnLm	Start	End	Ln
Whole brainstem volume	rs3124802	1	7753858	T	C	1p36.23	0.9379	-0.0613	0.0097	2.848e-10	ncRNA_exonic	CAMTA1:RP11-338N10.1	1.158	2b	T1L1	7723534	7890956	L1
	rs2032563	1	7801288	A	G	1p36.23	0.1935	-0.0375	0.006	4.07e-10	intronic	CAMTA1	0.48	7
	rs3789586	1	51054322	T	C	1p32.3	0.1524	0.0519	0.0065	1.693e-15	intronic	FAF1	3.193	7	T1L2	50826176	51532863	L2
	rs6593920	1	205037676	T	G	1q32.1	0.5426	-0.03	0.0047	2.086e-10	intronic	CNTN2	1.19	1f	T1L3	205023014	205054406	L3
	rs9428966	1	243667900	T	G	1q43	0.7323	-0.0353	0.0053	3.579e-11	UTR3	AKT3	12.86	7	T1L4	243643256	243672125	L4
	rs10803678	2	16148543	T	C	2p24.3	0.1715	-0.0379	0.0062	1.124e-09	ncRNA_intronic	AC010145.4	0.815	7	T1L5	16144411	16605174	L5
	rs76100108	2	16425361	T	C	2p24.3	0.061	0.0588	0.0098	1.85e-09	intergenic	AC010745.2	0.218	6
	rs1430036	2	16603087	T	G	2p24.3	0.8277	0.0399	0.0062	1.153e-10	ncRNA_intronic	AC010880.1	15.62	6
	rs139537302	2	27521167	A	G	2p23.3	0.9709	0.0882	0.0141	3.541e-10	intronic	TRIM54	1.162	7	T1L6	26945910	27590038	L6
	rs13388394	2	33764176	A	G	2p22.3	0.9583	-0.0877	0.0118	9.51e-14	exonic (missense)	RASGRP3	17.72	7	T1L7	33740855	33775665	L7
	rs62157778	2	88934090	A	G	2p11.2	0.2814	0.0489	0.0052	5.756e-21	intergenic	AC062029.1	3.984	6	T1L8	88856111	89139244	L8
	rs13028842	2	177042261	A	G	2q31.1	0.7429	-0.0358	0.0054	3.149e-11	ncRNA_exonic	HOXD-AS1	7.551	4	T1L9	176978383	177058002	L9
	rs150457564	2	177053426	A	C	2q31.1	0.9642	0.0864	0.0127	1.01e-11	ncRNA_intronic	HOXD-AS1:HOXD1	10.27	4
	rs281763	2	200794870	T	C	2q33.1	0.8087	0.0395	0.006	4.068e-11	UTR3	C2orf69:TYW5	1.66	NA	T1L10	200669108	201083193	L10
	rs10932662	2	217412652	T	G	2q35	0.6121	-0.0346	0.0048	8.578e-13	intronic	RPL37A	10.22	6	T1L11	217245937	218529842	L11
	rs12472626	2	217940670	A	G	2q35	0.169	-0.0404	0.0063	1.321e-10	intergenic	RP11-574O16.1	3.959	7
	rs62177906	2	218462399	T	C	2q35	0.0664	-0.0573	0.0095	1.424e-09	intergenic	DIRC3	1.783	6
	rs2234675	2	223085955	T	G	2q36.1	0.0424	-0.0865	0.0117	1.219e-13	exonic (missense)	PAX3	25.2	5	T1L12	223046616	223164518	L12
	rs12470153	2	223155911	C	G	2q36.1	0.663	-0.0323	0.005	1.308e-10	intronic	PAX3	10.86	2b
	rs16863657	2	223164518	A	G	2q36.1	0.8706	0.0531	0.0071	9.289e-14	intronic	CCDC140	4.904	4
	rs17010085	3	72708844	C	G	3p13	0.203	-0.0379	0.0058	7.171e-11	intergenic	RNA5SP136	1.274	4	T1L13	72708844	72709061	L13
	rs146550622	3	190638421	T	C	3q28	0.6146	-0.0347	0.0048	7.457e-13	intergenic	GMNC	1.731	7	T1L14	190592836	190678743	L14
	rs6444749	3	193546238	T	C	3q29	0.593	-0.0447	0.0048	1.23e-20	intergenic	RP11-528A4.2	4.423	4	T1L15	193533703	193575458	L15
	rs66637342	4	15134147	A	C	4p15.33	0.3833	-0.0402	0.0048	9.629e-17	ncRNA_intronic	RP11-665G4.1	5.887	6	T1L16	14927363	15190356	L16
	rs10027331	4	15149569	A	G	4p15.33	0.2447	-0.0535	0.0054	8.722e-23	ncRNA_intronic	RP11-665G4.1	5.293	4
	rs2703156	4	77938810	T	C	4q21.1	0.3945	0.0313	0.0048	9.064e-11	intronic	SEPT11	5.21	NA	T1L17	77885451	77938885	L17
	rs45499402	4	89043634	C	G	4q22.1	0.1142	-0.06	0.0079	2.538e-14	intronic	ABCG2	0.39	2c	T1L18	88913121	89054667	L18
	rs13170001	5	2685550	T	C	5p15.33	0.3395	0.0328	0.005	3.427e-11	intergenic	RP11-129I19.2	1.928	6	T1L19	2670593	2685567	L19
	rs1862626	5	56032940	T	G	5q11.2	0.7139	0.0374	0.0052	5.924e-13	intergenic	AC008940.1	2.045	4	T1L20	55992825	56260606	L20
	rs72764483	5	64962816	A	G	5q12.3	0.7444	-0.061	0.0054	9.328e-30	UTR3	SGTB	9.119	7	T1L21	64779214	65083148	L21
	rs2561225	5	65038564	A	G	5q12.3	0.2499	-0.0338	0.0054	4.707e-10	intronic	NLN	0.638	4
	rs115764052	5	118566243	T	C	5q23.1	0.034	-0.0827	0.0131	2.892e-10	intronic	DMXL1	0.076	6	T1L22	118447516	118598999	L22
	rs9505301	6	7887131	A	G	6p24.3	0.8982	-0.0719	0.0078	2.624e-20	intronic	TXNDC5:BLOC1S5-TXNDC5	8.206	4	T1L23	7864764	7908751	L23
	rs4470841	6	55319000	T	G	6p12.1	0.2719	-0.0327	0.0053	6.31e-10	intronic	HMGCLL1	2.626	6	T1L24	55307278	55376932	L24
	rs9398171	6	108983527	T	C	6q21	0.7074	0.0571	0.0051	1.277e-28	intronic	FOXO3	0.836	5	T1L25	108234793	109955623	L25
	rs12523793	6	149973764	A	G	6q25.1	0.3324	0.0412	0.005	1.428e-16	intergenic	KATNA1	1.657	7	T1L26	149871422	150247076	L26
	rs2639	7	6066461	T	C	7p22.1	0.7978	-0.0379	0.0058	8.716e-11	exonic (synonymous)	EIF2AK1	12.83	4	T1L27	6066461	6070856	L27
	rs12536500	7	50808033	T	C	7p12.1	0.2487	-0.0397	0.0054	2.614e-13	intronic	GRB10	7.681	4	T1L28	50770629	50875217	L28
	rs76928645	7	54941328	T	C	7p11.2	0.103	0.057	0.0077	1.859e-13	intergenic	SNORA73	11.09	6	T1L29	54916280	55279470	L29
	rs7334	7	55278852	A	C	7p11.2	0.2653	-0.0346	0.0053	7.752e-11	UTR3	EGFR	3.472	6
	rs1786345	8	101674751	A	C	8q22.3	0.5612	-0.0296	0.0047	4.743e-10	intronic	SNX31	0.729	NA	T1L30	101673922	101682208	L30
	rs17659542	8	116594538	T	C	8q23.3	0.1524	0.0399	0.0065	9.428e-10	intronic	TRPS1	18.57	5	T1L31	116464988	116644121	L31
	rs2173537	8	129047325	A	G	8q24.21	0.1679	-0.0438	0.0064	1.135e-11	ncRNA_intronic	PVT1	8.187	4	T1L32	129047325	129047325	L32
	rs7043476	9	14463450	T	C	9p22.3	0.7171	0.0336	0.0052	9.763e-11	intergenic	NFIB	3.302	6	T1L33	14457576	14464863	L33
	rs985223	9	118935817	A	G	9q33.1	0.6102	-0.0682	0.0048	1.382e-45	intronic	PAPPA	1.769	6	T1L34	118917007	119433973	L34
	rs62574179	9	118970563	A	G	9q33.1	0.9424	-0.0976	0.0106	2.399e-20	intronic	PAPPA	7.15	6
	rs72754266	9	119093757	A	G	9q33.1	0.0702	0.0661	0.0096	5.842e-12	intronic	PAPPA	6.85	5
	rs6478246	9	119368245	A	G	9q33.1	0.5381	-0.0275	0.0047	5.148e-09	intronic	ASTN2	2.37	3a
	rs1890966	10	99094436	A	G	10q24.1	0.3358	-0.0327	0.005	5.047e-11	ncRNA_exonic	FRAT2:RP11-452K12.4	11.33	NA	T1L35	98957311	99099397	L35
	rs12767683	10	104316581	A	C	10q24.32	0.3183	-0.0334	0.005	3.288e-11	intronic	SUFU	6.997	6	T1L36	104299191	104392580	L36
	rs56219400	11	43679588	A	G	11p11.2	0.7695	-0.0376	0.0056	1.647e-11	intergenic	HSD17B12	10.96	6	T1L37	43608866	43870871	L37
	rs12284087	11	68894753	T	C	11q13.3	0.2914	0.0313	0.0052	1.355e-09	intergenic	RP11-554A11.7	3.55	5	T1L38	68894753	69510653	L38
	rs61881112	11	68988174	A	G	11q13.3	0.9226	-0.0519	0.0088	3.46e-09	intergenic	RP11-554A11.8	3.493	4
	rs7121816	11	68990295	T	G	11q13.3	0.4973	-0.05	0.0047	1.075e-26	intergenic	RP11-554A11.8	3.318	7
	rs1485995	11	69307707	A	G	11q13.3	0.6709	-0.034	0.005	1.158e-11	intergenic	AP000439.3	0.127	NA
	rs1789166	11	69482091	A	C	11q13.3	0.6527	0.0417	0.005	3.849e-17	UTR3	ORAOV1	0.432	4
	rs496547	11	118576463	A	T	11q23.3	0.3515	-0.0302	0.0049	9.154e-10	ncRNA_intronic	AP002954.4	5.978	5	T1L39	118576463	118679882	L39
	rs7968440	12	51134741	A	G	12q13.12	0.6499	0.0309	0.0049	2.796e-10	intronic	DIP2B	1.527	6	T1L40	50648830	51217317	L40
	rs111883632	12	102323450	T	C	12q23.2	0.0965	0.0552	0.008	4.97e-12	intronic	DRAM1	0.402	2b	T1L41	102080847	102946220	L41
	rs11111090	12	102326461	A	C	12q23.2	0.5187	0.0753	0.0047	9.458e-58	intronic	DRAM1	3.741	5
	rs4313630	12	102335984	C	G	12q23.2	0.0567	-0.065	0.0103	2.585e-10	intronic	DRAM1	7.613	4
	rs10860831	12	102409546	T	G	12q23.2	0.2179	0.0556	0.0057	1.328e-22	intronic	CCDC53	0.686	1f
	rs146449130	12	102753909	A	G	12q23.2	0.0209	-0.1027	0.0168	1.063e-09	intergenic	IGF1	0.313	7
	rs11111293	12	102921296	T	C	12q23.2	0.7801	-0.0516	0.0056	6.946e-20	intergenic	RP11-210L7.1	19.36	2b
	rs10778482	12	106876035	A	T	12q23.3	0.5123	-0.0278	0.0047	3.069e-09	intronic	POLR3B	4.106	6	T1L42	106685848	107522203	L42
	rs56086971	12	107021838	A	G	12q23.3	0.8552	-0.0644	0.0067	6.068e-22	intronic	RP11-144F15.1:RFX4	1.538	6
	rs7307895	12	107332126	A	C	12q23.3	0.5696	-0.0322	0.0047	1.075e-11	intergenic	RP11-412D9.4	0.341	6
	rs9579179	13	29019720	T	G	13q12.3	0.4519	-0.0303	0.0047	1.632e-10	intronic	FLT1	4.299	6	T1L43	28968900	29021279	L43
	rs2241275	14	75251440	A	G	14q24.3	0.5334	-0.0286	0.0047	1.069e-09	intronic	YLPM1	2.221	1f	T1L44	75190531	75356855	L44
	rs11644675	16	52813601	A	G	16q12.2	0.429	0.0482	0.0047	2.264e-24	intergenic	RP11-297L17.6	12.39	4	T1L45	52684916	52917317	L45
	rs72813420	16	89926870	T	C	16q24.3	0.188	0.0373	0.0062	1.437e-09	intronic	SPIRE2	6.134	5	T1L46	89910833	89980571	L46
	rs203465	17	19810720	T	G	17p11.2	0.6096	0.0287	0.0048	2.016e-09	intronic	AKAP10	2.782	NA	T1L47	19804247	19904682	L47
	rs8614	17	27588806	A	C	17q11.2	0.1834	-0.0466	0.0061	1.354e-14	UTR3	NUFIP2	13.59	NA	T1L48	27564013	27588980	L48
	rs60642411	17	29390671	A	G	17q11.2	0.1422	0.0536	0.0068	2.245e-15	ncRNA_intronic	RP11-848P1.9	1.89	5	T1L49	29339909	29729207	L49
	rs55663797	17	43544379	A	G	17q21.31	0.1809	-0.0424	0.0061	4.64e-12	intronic	PLEKHM1	0.166	5	T1L50	43489161	44865603	L50
	rs2696559	17	44346674	T	C	17q21.31	0.7905	0.0455	0.0069	3.171e-11	downstream	RP11-259G18.1	4.556	NA
	rs916888	17	44863133	T	C	17q21.31	0.755	0.0414	0.0054	2.602e-14	intronic	WNT3	7.991	1f
	rs17820301	17	53872849	A	G	17q22	0.985	0.1479	0.0229	1.106e-10	intronic	PCTP	19.4	5	T1L51	53872849	53872849	L51
	rs470933	18	74695581	T	C	18q23	0.1519	0.0387	0.0065	3.414e-09	ncRNA_intronic	RP11-862L9.3:MBP	3.596	3a	T1L52	74529551	74703163	L52
	rs1363119	19	18444809	A	G	19p13.11	0.451	-0.0281	0.0047	2.612e-09	downstream	RN7SL513P	0.712	3a	T1L53	18423238	18444809	L53
	rs6050477	20	25221547	T	C	20p11.21	0.5098	0.0304	0.0047	9.886e-11	intergenic	PYGB	1.079	1f	T1L54	25189751	25986379	L54
	rs6051068	20	25950662	T	C	20p11.1	0.6644	0.0293	0.005	3.635e-09	downstream	RP4-760C5.5	4.855	6
	rs224329	20	34019579	T	C	20q11.22	0.3701	0.0365	0.0049	5.41e-14	intergenic	GDF5OS	0.271	5	T1L55	33888741	34026138	L55
	rs2206656	20	49130119	C	G	20q13.13	0.6184	0.0452	0.0048	9.67e-21	intronic	PTPN1	9.295	5	T1L56	49055276	49207352	L56
	rs12479469	20	61145196	A	G	20q13.33	0.3339	-0.0515	0.0052	1.802e-23	ncRNA_exonic	C20orf166-AS1	0.826	NA	T1L57	61141981	61158050	L57
	rs9982271	21	42519389	T	C	21q22.2	0.2185	-0.0367	0.0057	1.116e-10	ncRNA_intronic	LINC00323	6.313	5	T1L58	42513675	42525479	L58
	rs2097352	22	30236444	A	T	22q12.2	0.7494	0.0333	0.0054	8.919e-10	intergenic	ASCC2	7.018	3a	T1L59	30236395	30403996	L59
Medulla absolute volume	rs142451077	1	6844830	T	G	1p36.31	0.0939	0.0515	0.0082	3.544e-10	ncRNA_exonic	RP11-312B8.1	15.01	4	T2L1	6811059	7801288	L1
	rs7538105	1	7131336	A	T	1p36.31	0.3361	0.0311	0.005	7.169e-10	intronic	CAMTA1	19.93	6
	rs72853807	1	7730879	T	C	1p36.23	0.0606	0.0656	0.01	5.313e-11	intronic	CAMTA1	4.755	5
	rs12119962	1	7742501	T	C	1p36.23	0.2052	-0.0433	0.0059	2.512e-13	intronic	CAMTA1	0.608	5
	rs509345	1	150276022	A	G	1q21.2	0.5137	-0.0288	0.0048	1.697e-09	intronic	MRPS21	16.5	1f	T2L2	150264852	150499022	L60
	rs9428966	1	243667900	T	G	1q43	0.7322	-0.0341	0.0054	2.622e-10	UTR3	AKT3	12.86	7	T2L3	243663604	243721726	L4
	rs12996313	2	200997916	T	C	2q33.1	0.2002	-0.036	0.006	1.62e-09	intergenic	C2orf47	0.318	6	T2L4	200719460	201108181	L10
	rs2372958	2	217927074	A	G	2q35	0.7918	0.05	0.0059	2.607e-17	intergenic	RP11-574O16.1	3.315	5	T2L5	217902375	217940670	L11
	rs13025492	2	217933312	C	G	2q35	0.7585	-0.0338	0.0056	1.533e-09	intergenic	RP11-574O16.1	2.522	5
	rs961847	5	56041064	T	C	5q11.2	0.7128	0.0329	0.0053	4.655e-10	intergenic	AC008940.1	9.332	1f	T2L6	56031884	56191200	L20
	rs72764483	5	64962816	A	G	5q12.3	0.7451	-0.0577	0.0055	5.948e-26	UTR3	SGTB	9.119	7	T2L7	64779214	65006234	L21
	rs2153960	6	108988184	A	G	6q21	0.7082	0.0442	0.0052	2.272e-17	intronic	FOXO3	7.289	4	T2L8	108861264	109019323	L25
	rs1268066	6	126035041	T	C	6q22.31	0.3657	0.0463	0.005	1.617e-20	ncRNA_intronic	RP11-624M8.1:RP1-293L8.2	2.451	4	T2L9	125985934	126049705	L61
	rs75885086	6	126049705	T	C	6q22.31	0.0217	0.0956	0.0164	5.08e-09	ncRNA_intronic	RP11-624M8.1	7.115	5
	rs72971190	6	127088303	A	G	6q22.32	0.7691	-0.0349	0.0057	7.236e-10	intergenic	RPS4XP9	2.288	6	T2L10	126845380	127096527	L61
	rs12523793	6	149973764	A	G	6q25.1	0.3317	0.0335	0.0051	3.924e-11	intergenic	KATNA1	1.657	7	T2L11	149878896	150176833	L26
	rs42039	7	92244422	T	C	7q21.2	0.2431	0.0382	0.0056	8.496e-12	UTR3	CDK6	1.244	5	T2L12	92236164	92288106	L62
	rs1693560	8	101680292	A	G	8q22.3	0.5344	-0.0307	0.0048	1.638e-10	intergenic	SNX31	3.27	2b	T2L13	101673922	101681163	L30
	rs2032996	9	21168784	A	G	9p21.3	0.5643	0.0298	0.0048	5.432e-10	intergenic	IFNA21	1.983	7	T2L14	21157373	21197502	L63
	rs10983068	9	118918479	T	C	9q33.1	0.61	-0.0366	0.0049	1.046e-13	intronic	PAPPA	12.33	5	T2L15	118917007	119098518	L34
	rs72754248	9	119061396	A	G	9q33.1	0.07	0.0629	0.0093	1.64e-11	ncRNA_intronic	PAPPA:RP11-45A16.4	13.23	4
	rs369508364	9	125696599	T	C	9q33.2	0.0057	-0.2918	0.0319	6.123e-20	intergenic	ZBTB26	0.248	6	T2L16	125696599	125696599	L64
	rs1485995	11	69307707	A	G	11q13.3	0.6712	-0.0327	0.0051	1.421e-10	intergenic	AP000439.3	0.127	1b	T2L17	69307707	69307707	L38
	rs562059	11	118602058	T	G	11q23.3	0.6426	0.0335	0.005	1.901e-11	ncRNA_intronic	AP002954.4	0.052	7	T2L18	118576463	118680045	L39
	rs1047912	12	51138862	T	C	12q13.12	0.2998	0.0316	0.0052	1.137e-09	UTR3	DIP2B	13.97	1f	T2L19	50882355	51211775	L40
	rs11111293	12	102921296	T	C	12q23.2	0.7796	-0.04	0.0057	2.945e-12	intergenic	RP11-210L7.1	19.36	2b	T2L20	102409334	102942969	L41
	rs1882543	12	107067160	T	C	12q23.3	0.3452	0.0325	0.005	1.012e-10	intronic	RP11-144F15.1:RFX4	1.586	1b	T2L21	107041456	107285751	L42
	rs11068773	12	118443690	A	G	12q24.23	0.3793	-0.0294	0.0049	2.234e-09	intergenic	RFC5	1.684	6	T2L22	118438558	118443690	L65
	rs1363119	19	18444809	A	G	19p13.11	0.451	-0.0384	0.0048	1.474e-15	downstream	RN7SL513P	0.712	3a	T2L23	18412122	18444809	L53
	rs10422762	19	36157167	A	G	19q13.12	0.475	-0.0296	0.0048	4.89e-10	upstream	UPK1A	0.002	4	T2L24	36150764	36253317	L66
	rs12479469	20	61145196	A	G	20q13.33	0.3348	-0.0334	0.0052	1.544e-10	ncRNA_exonic	C20orf166-AS1	0.826	1b	T2L25	61145196	61145196	L57
	rs7067170	X	68382836	A	G	Xq13.1	0.2332	-0.0339	0.0046	2.878e-13	exonic (synonymous)	PJA1	0.959	5	T2L26	68377126	68382836	L67
Medulla relative volume	rs3762287	1	10478586	T	C	1p36.22	0.3444	0.0212	0.0034	3.507e-10	intronic	PGD	1.827	1f	T3L1	10237960	10481210	L68
	rs4951159	1	205012106	C	G	1q32.1	0.9141	-0.0357	0.0056	1.452e-10	upstream	CNTN2	0.16	4	T3L2	205012106	205205651	L3
	rs1560275	2	16445408	T	G	2p24.3	0.0783	-0.0347	0.0057	1.615e-09	intergenic	AC010745.2	1.173	6	T3L3	16420389	16452224	L5
	rs16856877	2	217927499	A	G	2q35	0.2081	-0.0229	0.0038	2.299e-09	intergenic	RP11-574O16.1	7.303	5	T3L4	217927057	217927499	L11
	rs58853735	3	48177829	T	C	3p21.31	0.2813	-0.0213	0.0035	9.583e-10	intergenic	RP11-1029M24.1	0.632	5	T3L5	48177829	48177829	L69
	rs17010085	3	72708844	C	G	3p13	0.2038	0.0263	0.0038	6.45e-12	intergenic	RNA5SP136	1.274	4	T3L6	72708844	72709792	L13
	rs2702534	4	15147403	T	C	4p15.33	0.3454	0.0206	0.0032	2.435e-10	ncRNA_intronic	RP11-665G4.1	3.611	2b	T3L7	15143018	15147403	L16
	rs13328187	5	87865365	T	C	5q14.3	0.7442	-0.0229	0.0035	9.258e-11	ncRNA_intronic	LINC00461	5.957	5	T3L8	87839003	87929869	L70
	rs9505293	6	7870593	T	G	6p24.3	0.1094	-0.0335	0.005	1.656e-11	intronic	BMP6	0.713	6	T3L9	7864764	7898147	L23
	rs1777220	6	126022602	T	G	6q22.31	0.3874	0.0303	0.0032	3.213e-21	ncRNA_intronic	RP11-624M8.1:RP1-293L8.2	6.933	5	T3L10	125985540	126039677	L61
	rs9403408	6	143166001	A	G	6q24.2	0.719	-0.0218	0.0035	2.585e-10	intronic	HIVEP2	4.262	3a	T3L11	143146424	143206826	L71
	rs76928645	7	54941328	T	C	7p11.2	0.1017	-0.0396	0.0051	1.259e-14	intergenic	SNORA73	11.09	6	T3L12	54916280	54966738	L29
	rs17784801	8	23689495	A	T	8p21.2	0.19	-0.0232	0.004	4.541e-09	intergenic	STC1	1.044	7	T3L13	23687103	23689598	L72
	rs7048266	9	21160684	C	G	9p21.3	0.4351	-0.0209	0.0031	2.109e-11	upstream	Y_RNA	0.605	7	T3L14	21157373	21197502	L63
	rs7850952	9	119200847	A	C	9q33.1	0.2642	-0.0233	0.0035	3.021e-11	intronic	ASTN2	10.86	4	T3L15	119154616	119484007	L34
	rs803903	9	119434290	A	G	9q33.1	0.3236	0.0259	0.0033	5.385e-15	intronic	ASTN2	10.22	4
	rs369508364	9	125696599	T	C	9q33.2	0.0056	-0.1409	0.0207	1.009e-11	intergenic	ZBTB26	0.248	6	T3L16	125696599	125696599	L64
	rs148739452	12	102099649	A	G	12q23.2	0.8481	0.0292	0.0047	5.961e-10	intronic	CHPT1	2.167	5	T3L17	102094493	102397528	L41
	rs111883632	12	102323450	T	C	12q23.2	0.0959	-0.0331	0.0053	4.426e-10	intronic	DRAM1	0.402	2b
	rs11111088	12	102324872	T	C	12q23.2	0.5188	-0.0449	0.0031	9.986e-47	intronic	DRAM1	2.143	5
	rs17032214	12	102397528	T	C	12q23.2	0.9871	0.087	0.0138	2.716e-10	intronic	DRAM1	19.34	5
	rs13339449	16	52809703	T	C	16q12.2	0.427	-0.0188	0.0031	2.048e-09	intergenic	RP11-297L17.6	0.094	6	T3L18	52805173	52869825	L45
	rs7503584	17	46055036	A	G	17q21.32	0.209	0.024	0.0038	3.032e-10	intronic	CDK5RAP3	7.949	1f	T3L19	46010893	46632679	L73
	rs8067216	17	46088197	A	G	17q21.32	0.2892	-0.0259	0.0034	3.719e-14	intergenic	RP11-6N17.10	0.214	6
	rs999493	17	46625519	A	G	17q21.32	0.6225	-0.0249	0.0032	1.033e-14	ncRNA_intronic	HOXB-AS1	19.79	3a
	rs12327278	18	38011902	T	C	18q12.3	0.1765	-0.0258	0.004	1.724e-10	intergenic	RNU7-145P	10.39	4	T3L20	38001132	38011902	L74
	rs1857731	18	49177965	A	G	18q21.2	0.382	0.0196	0.0032	7.482e-10	intergenic	RP11-440L16.1	2.635	5	T3L21	49162801	49179151	L75
	rs12459368	19	18459377	A	G	19p13.11	0.731	-0.0252	0.0035	3.576e-13	intronic	PGPEP1	1.888	7	T3L22	18449238	18471610	L53
Pons absolute volume	rs3789586	1	51054322	T	C	1p32.3	0.1507	0.0522	0.0073	9.674e-13	intronic	FAF1	3.193	7	T4L1	50830214	51507464	L2
	rs6593920	1	205037676	T	G	1q32.1	0.5416	-0.0367	0.0052	2.681e-12	intronic	CNTN2	1.19	1f	T4L2	205012106	205265370	L3
	rs2369633	1	205181062	T	C	1q32.1	0.0915	-0.059	0.0091	8.19e-11	upstream	DSTYK	5.491	1b
	rs55795022	2	16386265	A	T	2p24.3	0.1738	-0.0542	0.0077	1.981e-12	downstream	AC010745.1	16.11	5	T4L3	16386265	16615530	L5
	rs115581765	2	16420800	T	C	2p24.3	0.9456	-0.0879	0.0119	1.844e-13	intergenic	GACAT3	2.906	4
	rs1560368	2	16604293	T	C	2p24.3	0.1922	-0.0487	0.0067	2.919e-13	ncRNA_intronic	AC010880.1	5.564	5
	rs139537302	2	27521167	A	G	2p23.3	0.9714	0.0939	0.0157	2.351e-09	intronic	TRIM54	1.162	7	T4L4	26945910	27590038	L6
	rs13388394	2	33764176	A	G	2p22.3	0.9578	-0.0891	0.013	8.069e-12	exonic (missense)	RASGRP3	17.72	7	T4L5	33764176	33764176	L7
	rs62157778	2	88934090	A	G	2p11.2	0.282	0.0485	0.0058	6.725e-17	intergenic	AC062029.1	3.984	6	T4L6	88870632	89103554	L8
	rs1063657	2	177017871	T	C	2q31.1	0.2041	0.0458	0.0065	2.491e-12	UTR3	HOXD4	11.61	2b	T4L7	176995302	177349591	L9
	rs72927168	2	177019561	A	T	2q31.1	0.0377	-0.1096	0.0137	1.353e-15	intronic	HOXD3	21.5	5
	rs13403148	2	177349591	A	G	2q31.1	0.7361	-0.0352	0.0059	2.931e-09	intergenic	AC017048.1	16.22	3a
	rs2666289	2	217261397	T	C	2q35	0.6533	-0.0332	0.0055	1.444e-09	ncRNA_intronic	AC098820.2	1.55	1b	T4L8	217247420	217394973	L11
	rs11682486	2	223043000	A	G	2q36.1	0.4285	-0.0319	0.0053	1.981e-09	intergenic	PAX3	7.17	5	T4L9	223043000	223164518	L12
	rs2234675	2	223085955	T	G	2q36.1	0.0426	-0.0892	0.0129	4.905e-12	exonic (missense)	PAX3	25.2	5
	rs12470153	2	223155911	C	G	2q36.1	0.664	-0.0406	0.0056	5.483e-13	intronic	PAX3	10.86	2b
	rs16863657	2	223164518	A	G	2q36.1	0.8752	0.0662	0.0081	2.445e-16	intronic	CCDC140	4.904	4
	rs62252218	3	69882568	T	C	3p13	0.2159	0.0408	0.0069	3.172e-09	intronic	MITF	0.233	5	T4L10	69815329	69906503	L76
	rs17010085	3	72708844	C	G	3p13	0.2037	-0.0519	0.0065	1.117e-15	intergenic	RNA5SP136	1.274	4	T4L11	72704272	72709792	L13
	rs6444749	3	193546238	T	C	3q29	0.5928	-0.0494	0.0053	1.519e-20	intergenic	RP11-528A4.2	4.423	4	T4L12	193536382	193557301	L15
	rs13136309	4	15134596	T	C	4p15.33	0.61	0.0416	0.0054	1.388e-14	ncRNA_intronic	RP11-665G4.1	5.315	4	T4L13	15114392	15151976	L16
	rs6849711	4	15150488	T	C	4p15.33	0.2468	-0.063	0.0061	2.386e-25	ncRNA_intronic	RP11-665G4.1	7.633	5
	rs2703156	4	77938810	T	C	4q21.1	0.3915	0.0349	0.0054	1.034e-10	intronic	SEPT11	5.21	1f	T4L14	77885451	77938885	L17
	rs45499402	4	89043634	C	G	4q22.1	0.1149	-0.0587	0.0088	3.025e-11	intronic	ABCG2	0.39	2c	T4L15	89039082	89054667	L18
	rs13170001	5	2685550	T	C	5p15.33	0.3438	0.0398	0.0055	5.402e-13	intergenic	RP11-129I19.2	1.928	6	T4L16	2670593	2686712	L19
	rs6450401	5	56033234	C	G	5q11.2	0.7134	0.0396	0.0058	8.294e-12	intergenic	AC008940.1	7.027	4	T4L17	56025716	56191200	L20
	rs72764483	5	64962816	A	G	5q12.3	0.745	-0.0528	0.006	1.69e-18	UTR3	SGTB	9.119	7	T4L18	64779214	65083148	L21
	rs2561225	5	65038564	A	G	5q12.3	0.2509	-0.0385	0.0061	1.939e-10	intronic	NLN	0.638	4
	rs72829213	6	7864764	T	C	6p24.3	0.0908	0.0893	0.0091	1.162e-22	intronic	BMP6	0.181	5	T4L19	7861317	7898147	L23
	rs4715551	6	55319780	T	G	6p12.1	0.3085	-0.0346	0.0057	1.094e-09	intronic	HMGCLL1	1.567	7	T4L20	55307278	55717728	L24
	rs3798825	6	55716630	A	G	6p12.1	0.5361	0.0353	0.0053	2.475e-11	intronic	BMP5	3.383	6
	rs2153960	6	108988184	A	G	6q21	0.708	0.051	0.0057	4.399e-19	intronic	FOXO3	7.289	4	T4L21	108861264	109019323	L25
	rs12523793	6	149973764	A	G	6q25.1	0.3318	0.0422	0.0056	3.314e-14	intergenic	KATNA1	1.657	7	T4L22	149874899	150180259	L26
	rs41282676	7	6086610	C	G	7p22.1	0.9575	-0.0899	0.014	1.437e-10	intronic	EIF2AK1	0.604	5	T4L23	6035948	6102462	L27
	rs12536500	7	50808033	T	C	7p12.1	0.2498	-0.0426	0.006	1.869e-12	intronic	GRB10	7.681	4	T4L24	50770629	50875217	L28
	rs151057105	7	54944920	T	C	7p11.2	0.0924	0.0539	0.009	2.491e-09	intergenic	SNORA73	0.322	6	T4L25	54920906	55279470	L29
	rs940808	7	55279470	C	G	7p11.2	0.2607	-0.0382	0.006	1.85e-10	intronic	EGFR	0.439	5
	rs2721948	8	116643338	T	C	8q23.3	0.6047	0.0337	0.0054	2.923e-10	intronic	TRPS1	0.461	5	T4L26	116592145	116645056	L31
	rs2173537	8	129047325	A	G	8q24.21	0.1617	-0.0572	0.0074	9.056e-15	ncRNA_intronic	PVT1	8.187	4	T4L27	129047325	129047325	L32
	rs7043476	9	14463450	T	C	9p22.3	0.7165	0.0424	0.0058	2.374e-13	intergenic	NFIB	3.302	6	T4L28	14453010	14470106	L33
	rs985223	9	118935817	A	G	9q33.1	0.6098	-0.0744	0.0054	1.785e-43	intronic	PAPPA	1.769	6	T4L29	118917007	119453455	L34
	rs62574179	9	118970563	A	G	9q33.1	0.9434	-0.0998	0.0114	1.978e-18	intronic	PAPPA	7.15	6
	rs10817903	9	119343404	C	G	9q33.1	0.4623	0.038	0.0052	4.274e-13	ncRNA_intronic	ASTN2:RP11-67K19.3	18.41	5
	rs10792029	11	68966882	A	G	11q13.3	0.035	-0.086	0.0142	1.289e-09	intergenic	RP11-554A11.8	5.597	4	T4L30	68966882	69510653	L38
	rs61881112	11	68988174	A	G	11q13.3	0.9212	-0.0582	0.0097	2.008e-09	intergenic	RP11-554A11.8	3.493	4
	rs12788188	11	69003581	A	T	11q13.3	0.5013	0.0573	0.0053	1.99e-27	intergenic	MYEOV	0.466	6
	rs1789166	11	69482091	A	C	11q13.3	0.6468	0.0418	0.0055	2.602e-14	UTR3	ORAOV1	0.432	4
	rs11111026	12	102192803	T	G	12q23.2	0.1782	0.049	0.0069	8.834e-13	intronic	GNPTAB	1.128	6	T4L31	102185145	102942969	L41
	rs79685578	12	102231032	T	C	12q23.2	0.0749	-0.0592	0.0101	3.966e-09	downstream	RNA5SP369	3.2	7
	rs111883632	12	102323450	T	C	12q23.2	0.096	0.0582	0.009	8.506e-11	intronic	DRAM1	0.402	2b
	rs11111090	12	102326461	A	C	12q23.2	0.5188	0.0935	0.0052	5.501e-71	intronic	DRAM1	3.741	5
	rs76666326	12	102331923	T	G	12q23.2	0.0829	0.0629	0.0103	1.024e-09	intronic	DRAM1	5.792	5
	rs4313630	12	102335984	C	G	12q23.2	0.0535	-0.0805	0.0118	8.13e-12	intronic	DRAM1	7.613	4
	rs10860831	12	102409546	T	G	12q23.2	0.2181	0.0652	0.0063	7.785e-25	intronic	CCDC53	0.686	1f
	rs146449130	12	102753909	A	G	12q23.2	0.0197	-0.1132	0.0188	1.654e-09	intergenic	IGF1	0.313	7
	rs11111293	12	102921296	T	C	12q23.2	0.7797	-0.0618	0.0063	8.347e-23	intergenic	RP11-210L7.1	19.36	2b
	rs7969743	12	106872219	A	G	12q23.3	0.604	-0.0318	0.0054	3.01e-09	intronic	POLR3B	0.118	5	T4L32	106783379	107371178	L42
	rs56086971	12	107021838	A	G	12q23.3	0.8531	-0.0718	0.0074	4.454e-22	intronic	RP11-144F15.1:RFX4	1.538	6
	rs7307895	12	107332126	A	C	12q23.3	0.5694	-0.0343	0.0053	8.721e-11	intergenic	RP11-412D9.4	0.341	6
	rs9579179	13	29019720	T	G	13q12.3	0.4486	-0.0323	0.0053	1.162e-09	intronic	FLT1	4.299	6	T4L33	28968900	29021279	L43
	rs2241275	14	75251440	A	G	14q24.3	0.5338	-0.0311	0.0052	2.847e-09	intronic	YLPM1	2.221	1f	T4L34	75120628	75356855	L44
	rs11644675	16	52813601	A	G	16q12.2	0.4318	0.0547	0.0053	3.67e-25	intergenic	RP11-297L17.6	12.39	4	T4L35	52802761	52873960	L45
	rs8614	17	27588806	A	C	17q11.2	0.1839	-0.0423	0.0068	3.635e-10	UTR3	NUFIP2	13.59	1f	T4L36	27588806	27588980	L48
	rs60642411	17	29390671	A	G	17q11.2	0.1403	0.0542	0.0076	9.612e-13	ncRNA_intronic	RP11-848P1.9	1.89	5	T4L37	29389026	29623288	L49
	rs1635298	17	43744344	A	T	17q21.31	0.7589	0.0427	0.0061	1.878e-12	ncRNA_intronic	CRHR1:RP11-105N13.4	0.511	1f	T4L38	43463493	44865603	L50
	rs36050210	17	44353414	A	G	17q21.31	0.786	0.0462	0.0065	1.33e-12	intronic	ARL17B	4.277	6
	rs916888	17	44863133	T	C	17q21.31	0.7543	0.0415	0.0061	7.31e-12	intronic	WNT3	7.991	1f
	rs34822124	17	46648679	T	G	17q21.32	0.194	-0.0459	0.0072	1.632e-10	ncRNA_intronic	HOXB3:HOXB-AS3	2.744	2b	T4L39	46564225	46672716	L73
	rs17820301	17	53872849	A	G	17q22	0.9849	0.1733	0.0215	8.303e-16	intronic	PCTP	19.4	5	T4L40	53872849	53872849	L51
	rs6142373	20	33983314	A	T	20q11.22	0.6299	-0.0401	0.0058	6.489e-12	intronic	UQCC1	1.2	5	T4L41	33888741	34026138	L55
	rs6095988	20	49124561	C	G	20q13.13	0.3799	-0.0412	0.0054	2.937e-14	intergenic	PTPN1	1.013	6	T4L42	49113657	49205492	L56
	rs12479469	20	61145196	A	G	20q13.33	0.3343	-0.0411	0.0057	7.138e-13	ncRNA_exonic	C20orf166-AS1	0.826	1b	T4L43	61145196	61145196	L57
	rs9982271	21	42519389	T	C	21q22.2	0.2211	-0.0375	0.0063	3.276e-09	ncRNA_intronic	LINC00323	6.313	5	T4L44	42516327	42525479	L58
	rs28368435	22	46406695	A	G	22q13.31	0.3826	0.0377	0.0054	2.198e-12	intergenic	CITF22-92A6.1	0.064	5	T4L45	46400860	46409177	L77
	rs4893075	X	154429214	A	G	Xq28	0.7314	0.0293	0.005	3.321e-09	intronic	VBP1	4.07	6	T4L46	154429214	154949953	L78
Pons relative volume	rs733813	1	18907484	A	G	1p36.13	0.5129	0.0076	0.0012	4.337e-11	intergenic	RP1-8B22.2	2.756	4	T5L1	18905422	18930263	L79
	rs401869	1	42281302	A	C	1p34.2	0.2259	0.0082	0.0014	3.949e-09	intronic	HIVEP3	0.314	1f	T5L2	42281302	42371414	L80
	rs2764839	1	42368704	A	G	1p34.2	0.3591	0.0085	0.0012	1.036e-12	intronic	HIVEP3	5.111	1b
	rs4951159	1	205012106	C	G	1q32.1	0.9142	0.0155	0.0021	7.914e-14	upstream	CNTN2	0.16	4	T5L3	205012106	205248032	L3
	rs6696846	1	205041952	T	C	1q32.1	0.487	0.0081	0.0012	2.143e-12	intronic	CNTN2	8.834	5
	rs1033200	2	16422981	T	C	2p24.3	0.9361	-0.0179	0.0023	2.061e-14	intergenic	AC010745.2	18.35	5	T5L4	16420389	16617085	L5
	rs34137698	2	16610776	A	G	2p24.3	0.787	0.0098	0.0014	2.686e-12	ncRNA_intronic	AC010880.1	0.028	5
	rs847164	2	176992444	T	C	2q31.1	0.0727	-0.0134	0.0022	1.808e-09	ncRNA_intronic	HOXD-AS2	2.085	2b	T5L5	176992444	176992444	L9
	rs16863657	2	223164518	A	G	2q36.1	0.8758	0.0129	0.0018	4.439e-13	intronic	CCDC140	4.904	4	T5L6	223164518	223164518	L12
	rs1542696	3	3649245	A	G	3p26.2	0.658	0.0071	0.0012	4.939e-09	ncRNA_intronic	AC026188.1	1.333	7	T5L7	3644532	3649245	L81
	rs2470540	3	15718652	A	T	3p25.1	0.5983	-0.0074	0.0012	1.985e-10	intronic	ANKRD28	3.141	7	T5L8	15691944	15970334	L82
	rs17010085	3	72708844	C	G	3p13	0.2038	-0.0119	0.0014	7.695e-17	intergenic	RNA5SP136	1.274	4	T5L9	72704223	72709792	L13
	rs4396983	4	15132604	A	G	4p15.33	0.444	-0.0068	0.0012	4.615e-09	ncRNA_intronic	RP11-665G4.1	2.745	4	T5L10	15113626	15151366	L16
	rs6849711	4	15150488	T	C	4p15.33	0.2476	-0.0097	0.0013	3.004e-13	ncRNA_intronic	RP11-665G4.1	7.633	5
	rs417897	5	2523577	T	C	5p15.33	0.3113	0.0072	0.0012	4.882e-09	intergenic	RP11-129I19.2	1.937	5	T5L11	2523166	2685567	L19
	rs116818968	5	2538791	A	C	5p15.33	0.9821	-0.028	0.0044	1.185e-10	intergenic	RP11-129I19.2	5.988	5
	rs13170001	5	2685550	T	C	5p15.33	0.3442	0.0075	0.0012	7.806e-10	intergenic	RP11-129I19.2	1.928	6
	rs3799534	6	7868368	T	C	6p24.3	0.9096	-0.015	0.002	7.844e-14	intronic	BMP6	11.54	7	T5L12	7861317	7898147	L23
	rs9265711	6	31301905	A	G	6p21.33	0.6115	-0.0079	0.0012	4.751e-11	intergenic	LINC02571	7.415	7	T5L13	31284136	31459768	L83
	rs2248372	6	31446466	A	G	6p21.33	0.3097	-0.0081	0.0012	8.357e-11	intergenic	HCG26	2.703	1a
	rs9382493	6	55316430	T	C	6p12.1	0.7555	0.0083	0.0013	5.117e-10	intronic	HMGCLL1	3.112	7	T5L14	55307278	55717728	L24
	rs3798825	6	55716630	A	G	6p12.1	0.5366	0.0077	0.0012	3.991e-11	intronic	BMP5	3.383	6
	rs2294405	6	99292136	A	G	6q16.1	0.3304	-0.008	0.0012	6.391e-11	intergenic	POU3F2	19.22	1f	T5L15	99280657	100218079	L84
	rs606599	6	100123514	A	G	6q16.2	0.6204	0.0094	0.0012	4.056e-15	intergenic	Y_RNA	0.583	6
	rs12213228	6	109369169	A	G	6q21	0.8884	0.0112	0.0019	5.148e-09	intronic	SESN1	2.446	7	T5L16	109290606	109495137	L25
	rs1268066	6	126035041	T	C	6q22.31	0.3649	-0.0099	0.0012	1.477e-16	ncRNA_intronic	RP11-624M8.1:RP1-293L8.2	2.451	4	T5L17	125985934	126039994	L61
	rs1909457	8	129031617	T	C	8q24.21	0.6288	-0.008	0.0012	3.747e-11	ncRNA_intronic	PVT1	3.506	4	T5L18	129031617	129047325	L32
	rs2173537	8	129047325	A	G	8q24.21	0.1611	-0.0117	0.0016	6.813e-13	ncRNA_intronic	PVT1	8.187	4
	rs10733282	9	14458638	T	C	9p22.3	0.275	-0.0096	0.0013	1.005e-13	intergenic	NFIB	3.631	7	T5L19	14453010	14757877	L33
	rs7864052	9	14757877	A	C	9p22.3	0.5677	0.0074	0.0012	3.967e-10	intronic	FREM1	11.44	7
	rs564	9	96328303	T	C	9q22.31	0.6588	0.0081	0.0012	2.353e-11	UTR3	FAM120A	17.04	2b	T5L20	96181075	96378933	L85
	rs811458	9	119405271	T	C	9q33.1	0.3141	-0.0117	0.0012	3.823e-21	intronic	ASTN2	4.455	7	T5L21	119296073	119490338	L34
	rs10983328	9	119490338	A	G	9q33.1	0.2606	0.0079	0.0013	4.256e-09	intronic	ASTN2	0.429	7
	rs369508364	9	125696599	T	C	9q33.2	0.0056	0.0561	0.0077	3.528e-13	intergenic	ZBTB26	0.248	6	T5L22	125696599	125696599	L64
	rs9667638	11	69004339	A	T	11q13.3	0.5059	0.0093	0.0012	7.667e-16	intergenic	MYEOV	3.115	6	T5L23	68972657	69036064	L38
	rs61881141	11	69017347	C	G	11q13.3	0.9153	-0.0124	0.0021	2.053e-09	intergenic	MYEOV	8.983	4
	rs56098072	12	54501180	T	C	12q13.13	0.9217	0.0128	0.0021	1.848e-09	ncRNA_intronic	RP11-834C11.3:RP11-834C11.5	9.473	4	T5L24	54491637	54502283	L86
	rs78079939	12	97862986	A	T	12q23.1	0.1878	-0.0094	0.0015	1.719e-10	ncRNA_intronic	RMST	1.037	6	T5L25	97850735	97868510	L87
	rs12579890	12	102094578	C	G	12q23.2	0.1508	0.0108	0.0016	2.829e-11	intronic	CHPT1	0.161	4	T5L26	102094578	102865052	L41
	rs10492086	12	102187941	A	G	12q23.2	0.8216	-0.0112	0.0015	1.043e-13	intronic	GNPTAB	8.042	7
	rs111883632	12	102323450	T	C	12q23.2	0.0958	0.0136	0.002	6.556e-12	intronic	DRAM1	0.402	2b
	rs11111090	12	102326461	A	C	12q23.2	0.5187	0.021	0.0012	5.185e-74	intronic	DRAM1	3.741	5
	rs10860831	12	102409546	T	G	12q23.2	0.2179	0.0109	0.0014	5.89e-15	intronic	CCDC53	0.686	1f
	rs11611815	12	106749608	A	C	12q23.3	0.7668	-0.0082	0.0014	2.009e-09	intergenic	POLR3B	1.898	7	T5L27	106739439	106927635	L42
	rs12050391	14	32771346	A	C	14q12	0.2248	0.0081	0.0014	3.968e-09	intergenic	AKAP6	2.374	5	T5L28	32736459	32779379	L88
	rs13339449	16	52809703	T	C	16q12.2	0.427	0.0112	0.0012	1.164e-21	intergenic	RP11-297L17.6	0.094	6	T5L29	52802761	52873960	L45
	rs729786	17	46060231	T	G	17q21.32	0.2599	-0.0107	0.0013	4.291e-16	ncRNA_intronic	RP11-6N17.10	7.673	4	T5L30	46045484	46687752	L73
	rs34490194	17	46648744	T	C	17q21.32	0.1936	-0.0135	0.0015	3.582e-20	ncRNA_intronic	HOXB3:HOXB-AS3	9.245	4
	rs11877758	18	35138110	T	G	18q12.2	0.6925	-0.0086	0.0013	5.068e-12	intronic	CELF4	2.718	7	T5L31	35127427	35204858	L89
	rs4390658	18	37981028	C	G	18q12.3	0.5844	0.0069	0.0012	3.423e-09	intergenic	RNU7-145P	0.112	6	T5L32	37963654	38011902	L74
	rs16973299	18	38004201	A	G	18q12.3	0.1763	0.0142	0.0015	3.769e-21	intergenic	RNU7-145P	0.047	7
	rs35343344	19	18471610	A	C	19p13.11	0.2635	-0.008	0.0013	2.582e-09	intronic	PGPEP1	3.995	6	T5L33	18471610	18471610	L53
	rs6046627	20	20086530	A	G	20p11.23	0.269	0.0087	0.0013	5.073e-11	intronic	C20orf26	0.303	6	T5L34	20071634	20086530	L90
	rs28660442	22	46401657	A	G	22q13.31	0.6181	-0.0071	0.0012	2.02e-09	intergenic	CITF22-92A6.1	0.42	5	T5L35	46400860	46408879	L77
	rs11539157	X	68381264	A	C	Xq13.1	0.2331	0.0067	0.0011	2.367e-09	exonic (missense)	PJA1	16	5	T5L36	68381264	68382836	L67
Midbrain absolute volume	rs228729	1	7845695	T	C	1p36.23	0.3396	-0.0284	0.0048	2.794e-09	intronic	PER3	4.643	1f	T6L1	7845695	7890956	L1
	rs9428966	1	243667900	T	G	1q43	0.7323	-0.0322	0.0051	3.246e-10	UTR3	AKT3	12.86	7	T6L2	243663604	243672074	L4
	rs4670190	2	33763519	A	G	2p22.3	0.1528	0.0402	0.0063	1.443e-10	intronic	RASGRP3	0.045	7	T6L3	33740855	33781923	L7
	rs67070774	3	49900350	A	G	3p21.31	0.1385	0.0383	0.0066	5.395e-09	intronic	CAMKV	2.58	5	T6L4	49900350	49900350	L91
	rs1426383	3	152016969	T	C	3q25.1	0.2999	0.0318	0.0049	1.033e-10	intronic	MBNL1	22	1f	T6L5	151990779	152148438	L92
	rs889312	5	56031884	A	C	5q11.2	0.7168	0.0326	0.005	7.797e-11	intergenic	AC008940.1	20.1	3a	T6L6	56025716	56191200	L20
	rs16893969	5	64858889	A	C	5q12.3	0.2551	0.0481	0.0052	1.658e-20	intronic	CENPK	8.758	1c	T6L7	64779214	65062842	L21
	rs2591928	5	65040267	A	G	5q12.3	0.749	0.0315	0.0052	1.599e-09	intronic	NLN	0.955	5
	rs115764052	5	118566243	T	C	5q23.1	0.035	-0.0755	0.0123	7.985e-10	intronic	DMXL1	0.076	6	T6L8	118566243	118566243	L22
	rs249616	5	139529656	T	C	5q31.3	0.5131	0.0314	0.0046	6.609e-12	intergenic	CTB-131B5.5	4.73	5	T6L9	139517197	139690103	L93
	rs2153960	6	108988184	A	G	6q21	0.708	0.0453	0.0049	3.89e-20	intronic	FOXO3	7.289	4	T6L10	108861264	109019323	L25
	rs12523793	6	149973764	A	G	6q25.1	0.3318	0.0363	0.0048	3.781e-14	intergenic	KATNA1	1.657	7	T6L11	149874899	150180259	L26
	rs151057105	7	54944920	T	C	7p11.2	0.0925	0.0857	0.0078	4.237e-28	intergenic	SNORA73	0.322	6	T6L12	54909928	55279470	L29
	rs9642564	7	55145334	A	G	7p11.2	0.2535	-0.0341	0.0052	5.368e-11	intronic	EGFR	6.411	4
	rs7334	7	55278852	A	C	7p11.2	0.2639	-0.0333	0.0051	8.106e-11	UTR3	EGFR	3.472	6
	rs42039	7	92244422	T	C	7q21.2	0.2434	0.0309	0.0053	5.159e-09	UTR3	CDK6	1.244	5	T6L13	92239531	92263789	L62
	rs718766	7	121025502	T	C	7q31.31	0.7253	0.0314	0.0051	5.464e-10	intronic	FAM3C	0.671	6	T6L14	120965464	121037822	L94
	rs2978098	8	101676675	A	C	8q22.3	0.5336	-0.0333	0.0045	1.727e-13	intergenic	SNX31	4.434	6	T6L15	101673265	101682518	L30
	rs2737205	8	116610180	T	C	8q23.3	0.4393	-0.0271	0.0046	3.148e-09	intronic	TRPS1	1.252	6	T6L16	116473478	116644121	L31
	rs1160248	9	118944239	T	C	9q33.1	0.6122	-0.0415	0.0046	4.291e-19	intronic	PAPPA	7.023	5	T6L17	118917007	119098518	L34
	rs62574179	9	118970563	A	G	9q33.1	0.9434	-0.0722	0.0098	1.97e-13	intronic	PAPPA	7.15	6
	rs35565319	9	119065043	T	C	9q33.1	0.0698	0.0538	0.0088	1.201e-09	exonic (synonymous)	PAPPA	18.29	6
	rs369508364	9	125696599	T	C	9q33.2	0.0057	-0.2115	0.0301	2.268e-12	intergenic	ZBTB26	0.248	6	T6L18	125696599	125696599	L64
	rs10786333	10	99090390	A	G	10q24.1	0.5987	0.03	0.0046	7.567e-11	intergenic	FRAT2	3.421	7	T6L19	98971960	99099397	L35
	rs7929999	11	10470440	C	G	11p15.4	0.4683	-0.0275	0.0045	1.536e-09	intronic	AMPD3	0.657	3a	T6L20	10458596	10481956	L95
	rs11037530	11	43656676	C	G	11p11.2	0.2268	0.0322	0.0054	2.216e-09	intergenic	HSD17B12	0.968	6	T6L21	43608866	43703384	L65
	rs11111088	12	102324872	T	C	12q23.2	0.5189	0.0296	0.0046	8.011e-11	intronic	DRAM1	2.143	5	T6L22	102324872	102338295	L41
	rs2151465	13	24117862	A	G	13q12.12	0.4254	0.0278	0.0046	1.349e-09	intergenic	TNFRSF19	3.511	6	T6L23	24113622	24153565	L96
	rs179744	14	31496212	T	C	14q12	0.4698	0.0305	0.0045	1.997e-11	UTR5	AP4S1	5.937	1f	T6L24	31361742	31505048	L97
	rs184867122	14	53766575	A	C	14q22.1	0.7359	0.0351	0.0052	1.723e-11	ncRNA_intronic	AL163953.3	0.945	7	T6L25	53714999	53989649	L98
	rs117861560	14	53978146	T	G	14q22.1	0.3293	0.0285	0.0048	3.5e-09	ncRNA_intronic	AL163953.3	0.916	5
	rs7402982	15	99193269	A	G	15q26.3	0.4164	0.0283	0.0047	1.53e-09	intronic	IGF1R	7.74	4	T6L26	99177652	99193269	L99
	rs8049669	16	69551467	A	T	16q22.1	0.4269	0.0279	0.0047	3.23e-09	intergenic	NFAT5	1.261	7	T6L27	69551467	69611893	L100
	rs860335	17	19837679	A	G	17p11.2	0.6055	0.0286	0.0046	5.045e-10	intronic	AKAP10	2.304	1f	T6L28	19804247	19904682	L47
	rs60642411	17	29390671	A	G	17q11.2	0.1403	0.0423	0.0065	1.071e-10	ncRNA_intronic	RP11-848P1.9	1.89	5	T6L29	29389026	29623288	L49
	rs62066672	17	43200993	A	G	17q21.31	0.1872	-0.0348	0.0058	2.353e-09	intronic	PLCD3	5.841	2b	T6L30	43197085	44863133	L50
	rs1635288	17	43756969	A	G	17q21.31	0.2446	-0.0377	0.0052	6.344e-13	ncRNA_intronic	CRHR1:RP11-105N13.4	7.732	1f
	rs199491	17	44515243	T	C	17q21.31	0.2359	-0.0426	0.006	1.564e-12	ncRNA_intronic	NSFP1	2.259	5
	rs6095988	20	49124561	C	G	20q13.13	0.3799	-0.0293	0.0047	3.318e-10	intergenic	PTPN1	1.013	6	T6L31	49113657	49205492	L56
	rs12479469	20	61145196	A	G	20q13.33	0.3343	-0.0502	0.0049	2.465e-24	ncRNA_exonic	C20orf166-AS1	0.826	1b	T6L32	61142975	61190367	L57
	rs6143044	20	61166909	A	C	20q13.33	0.1972	0.0371	0.0057	9.074e-11	intronic	C20orf166	2.493	1f
	rs35335714	21	42517341	T	C	21q22.2	0.779	0.0327	0.0055	2.144e-09	ncRNA_intronic	LINC00323	3.925	5	T6L33	42515277	42525479	L58
	rs2885287	X	68377499	A	G	Xq13.1	0.2367	-0.0325	0.0044	1.322e-13	intergenic	PJA1	3.898	1f	T6L34	68377126	68382836	L67
Midbrain relative volume	rs2331753	1	180711938	T	C	1q25.3	0.1556	0.0193	0.0032	2.384e-09	intronic	XPR1	1.301	1f	T7L1	180600141	180782329	L101
	rs517246	1	244448513	A	C	1q44	0.0917	0.0363	0.0042	5.482e-18	intergenic	C1orf100	21.4	5	T7L2	244448353	244450406	L4
	rs10803194	1	244449423	A	G	1q44	0.547	0.0138	0.0024	4.93e-09	intergenic	C1orf100	0.724	5
	rs55795022	2	16386265	A	T	2p24.3	0.1735	0.026	0.0034	3.536e-14	downstream	AC010745.1	16.11	5	T7L3	16386265	16629316	L5
	rs116784386	2	16457697	C	G	2p24.3	0.0676	-0.0293	0.0046	2.47e-10	intergenic	AC010745.4	0.008	7
	rs1001129	2	16605354	A	G	2p24.3	0.8123	-0.0183	0.003	7.67e-10	ncRNA_intronic	AC010880.1	3.058	1f
	rs1431071	2	226353554	T	G	2q36.3	0.2932	0.0188	0.0025	1.629e-13	intronic	NYAP2	5.84	1f	T7L4	226336692	226601173	L102
	rs6740674	2	226471864	T	C	2q36.3	0.6658	0.0149	0.0025	1.126e-09	intronic	NYAP2	3.913	7
	rs6849711	4	15150488	T	C	4p15.33	0.2471	0.0159	0.0027	3.567e-09	ncRNA_intronic	RP11-665G4.1	7.633	5	T7L5	15149569	15151366	L16
	rs12500531	4	23725345	A	G	4p15.2	0.1779	0.0195	0.0032	1.556e-09	ncRNA_intronic	RP11-380P13.1:RP11-380P13.2	2.342	7	T7L6	23725345	23753053	L103
	rs13170001	5	2685550	T	C	5p15.33	0.344	-0.0158	0.0024	1.085e-10	intergenic	RP11-129I19.2	1.928	6	T7L7	2683885	2685567	L19
	rs72865364	6	55588347	C	G	6p12.1	0.8977	0.0236	0.0038	7.07e-10	intergenic	BMP5	0.904	7	T7L8	55565836	55628283	L24
	rs62446652	7	19549163	C	G	7p21.1	0.1803	0.0177	0.003	5.479e-09	ncRNA_intronic	AC007091.1	0.03	7	T7L9	19549163	19568504	L104
	rs149352678	7	54920906	T	C	7p11.2	0.0922	0.0426	0.004	2.863e-26	intergenic	SNORA73	1.472	7	T7L10	54909928	55015505	L29
	rs2173537	8	129047325	A	G	8q24.21	0.1614	0.0222	0.0033	1.219e-11	ncRNA_intronic	PVT1	8.187	4	T7L11	129047325	129047325	L32
	rs503162	9	14466376	A	C	9p22.3	0.7791	-0.0187	0.0028	1.971e-11	intergenic	RP11-408A13.2	8.072	4	T7L12	14453010	14470106	L33
	rs10821159	9	96314397	A	T	9q22.31	0.6586	-0.015	0.0025	1.007e-09	intronic	FAM120A	18.33	7	T7L13	96190382	96378933	L85
	rs2416565	9	119370722	C	G	9q33.1	0.4506	-0.0149	0.0023	1.549e-10	intronic	ASTN2	5.282	5	T7L14	119297707	119447750	L34
	rs3885274	11	47119875	A	T	11p11.2	0.32	-0.0159	0.0025	2.076e-10	intronic	C11orf49	3.156	6	T7L15	46798631	47242761	L105
	rs2892655	12	32490229	A	T	12p11.21	0.2128	0.0226	0.0028	1.373e-15	intronic	BICD1	0.066	6	T7L16	32455973	32590854	L106
	rs4301837	12	102336310	T	C	12q23.2	0.5036	-0.0255	0.0023	1.231e-27	intronic	DRAM1	4.068	5	T7L17	102324872	102922986	L41
	rs79076266	12	102417638	A	C	12q23.2	0.1764	-0.0283	0.003	1.239e-20	intronic	CCDC53	4.379	5
	rs11111293	12	102921296	T	C	12q23.2	0.7796	0.018	0.0028	1.213e-10	intergenic	RP11-210L7.1	19.36	2b
	rs10778511	12	107225331	A	T	12q23.3	0.7539	0.0164	0.0027	1.178e-09	intronic	RIC8B	11.08	3a	T7L18	107156820	107290619	L42
	rs34421054	12	118437058	T	C	12q24.23	0.2782	0.0156	0.0027	4.058e-09	intergenic	RFC5	2.295	7	T7L19	118437058	118437058	L65
	rs2359237	14	75245002	A	G	14q24.3	0.536	-0.0151	0.0025	9.454e-10	intronic	YLPM1	1.672	6	T7L20	75190531	75368547	L44
	rs45465998	16	52583410	A	G	16q12.1	0.2418	-0.0182	0.0027	2.004e-11	intergenic	TOX3	0.642	5	T7L21	52538040	52873960	L45
	rs11644675	16	52813601	A	G	16q12.2	0.4318	-0.0177	0.0023	4.059e-14	intergenic	RP11-297L17.6	12.39	4
	rs2365	18	35263298	T	C	18q12.2	0.7098	0.0164	0.0026	1.898e-10	intergenic	RP11-19F9.1	3.11	4	T7L22	35263298	35278126	L51
	rs1433848	18	37941245	C	G	18q12.3	0.4122	-0.0142	0.0024	1.765e-09	intergenic	RNU7-145P	1.238	7	T7L23	37941245	37974069	L74
	rs6062237	20	61154437	T	C	20q13.33	0.6874	0.0155	0.0025	6.383e-10	intronic	C20orf166	6.312	1f	T7L24	61149695	61157940	L57
SCP absolute volume	rs1376888	2	237643604	T	C	2q37.3	0.5779	0.0459	0.0062	1.617e-13	ncRNA_intronic	AC011286.1	3.509	5	T8L1	237615524	237644199	L107
	rs17773703	3	66380191	C	G	3p14.1	0.7413	-0.0456	0.0071	1.148e-10	intronic	SLC25A26	1.22	7	T8L2	66318457	66444697	L108
	rs12500531	4	23725345	A	G	4p15.2	0.1777	0.057	0.0087	5.042e-11	ncRNA_intronic	RP11-380P13.1:RP11-380P13.2	2.342	7	T8L3	23715876	23848631	L103
	rs2970853	4	23823519	A	G	4p15.2	0.2733	-0.0448	0.0069	9.039e-11	intronic	PPARGC1A	1.363	6
	rs72762452	5	64880232	T	C	5q12.3	0.7458	-0.0524	0.0071	1.248e-13	intronic	PPWD1	8.727	6	T8L4	64779214	65006234	L21
	rs10781130	9	75824432	A	G	9q21.13	0.2978	-0.0431	0.0072	2.651e-09	intergenic	ANXA1	3.807	6	T8L5	75824432	75849823	L109
	rs17727841	12	102809630	C	G	12q23.2	0.179	0.0551	0.008	6.591e-12	intronic	IGF1	0.749	1f	T8L6	102394872	102924964	L41
	rs13040737	20	61161954	A	G	20q13.33	0.2318	0.0446	0.0074	1.371e-09	intronic	C20orf166	4.991	3a	T8L7	61161749	61182916	L57
SCP relative volume	rs7556982	2	237644199	A	G	2q37.3	0.5777	0.0465	0.0056	1.21e-16	ncRNA_intronic	AC011286.1	4.769	7	T9L1	237604556	237644199	L107
	rs36083520	4	23715876	T	C	4p15.2	0.8223	-0.0465	0.0073	2.004e-10	ncRNA_intronic	RP11-380P13.1	14.25	6	T9L2	23715876	23846498	L103
	rs2970853	4	23823519	A	G	4p15.2	0.2733	-0.038	0.0062	1.081e-09	intronic	PPARGC1A	1.363	6
	rs6554395	4	57745566	T	C	4q12	0.4652	0.0393	0.0056	2.685e-12	intergenic	REST	12.69	6	T9L3	57744248	57838999	L110
	rs2286184	7	84630516	T	C	7q21.11	0.204	0.0403	0.0069	4.877e-09	intronic	SEMA3D	17.9	3a	T9L4	84630516	84688196	L111
	rs10781130	9	75824432	A	G	9q21.13	0.2978	-0.0443	0.0065	1.011e-11	intergenic	ANXA1	3.807	6	T9L5	75818300	75849823	L109
	rs113122856	17	9143458	A	G	17p13.1	0.8361	-0.0482	0.0081	2.502e-09	UTR3	NTN1	7.457	2b	T9L6	9143458	9155926	L112
	rs9898948	17	20417975	T	C	17p11.2	0.1404	-0.0479	0.0081	3.275e-09	ncRNA_exonic	AC025627.9	13.24	5	T9L7	19838927	20417975	L47
Note: TnLm means the mth locus for the nth trait. Ln is the nth LD-independent locus. Abbereviations: A1, effect allele; A2, non-effect allele; CADD, combined annotation-dependent depletion; CHR, chromosome; EAF, effect allele frequency; Nearest Gene, protein-coding gene containing the lead variant or nearest to the lead variant; RDB, RegulomeDB; SE, standard error.

## Sheet: Table S9
Supplementary Table 9. Genetic discovery (P < 5.56 × 10-9) in cross-ancestry GWAS meta-analyses.
Variant-trait association											Variant annotation				Locus-trait association			LD-independent locus
Trait	Variant	CHR	Position	A1	A2	Band	EAF	Beta	SE	P	Location	Nearest gene	CADD	RDB	TnLm	Start	End	Ln
Whole brainstem volume	rs6690584	1	7078434	T	G	1p36.31	0.6976	-0.0292	0.0048	1.156e-09	intronic	CAMTA1	0.655	5	T1L1	7062138	7890956	L1
	rs75630480	1	7765320	C	G	1p36.23	0.8083	0.0414	0.006	4.336e-12	intronic	CAMTA1	3.271	4
	rs3789586	1	51054322	T	C	1p32.3	0.1532	0.0488	0.0061	1.563e-15	intronic	FAF1	3.193	7	T1L2	50818534	51553033	L2
	rs895932	1	205023014	A	G	1q32.1	0.5277	0.0272	0.0045	1.54e-09	intronic	CNTN2	0.357	5	T1L3	205023014	205040943	L3
	rs9428966	1	243667900	T	G	1q43	0.7304	-0.0362	0.005	3.721e-13	UTR3	AKT3	12.86	7	T1L4	243643256	243680449	L4
	rs10803678	2	16148543	T	C	2p24.3	0.2246	-0.0333	0.0056	3.249e-09	ncRNA_intronic	AC010145.4	0.815	7	T1L5	16146706	16605174	L5
	rs1430036	2	16603087	T	G	2p24.3	0.8319	0.0376	0.0059	2.357e-10	ncRNA_intronic	AC010880.1	15.62	6
	rs13388394	2	33764176	A	G	2p22.3	0.9587	-0.0845	0.0117	6.182e-13	exonic (missense)	RASGRP3	17.72	7	T1L6	33740855	33787708	L6
	rs62157778	2	88934090	A	G	2p11.2	0.3027	0.052	0.0048	5.915e-27	intergenic	AC062029.1	3.984	6	T1L7	88840761	89139244	L7
	rs13028842	2	177042261	A	G	2q31.1	0.747	-0.0349	0.0054	6.686e-11	ncRNA_exonic	HOXD-AS1	7.551	4	T1L8	177006484	177042261	L8
	rs281793	2	200847990	A	G	2q33.1	0.7969	0.0379	0.0055	8.515e-12	intronic	C2orf47	0.827	5	T1L9	200676102	201108181	L9
	rs10932662	2	217412652	T	G	2q35	0.6259	-0.0342	0.0046	1.338e-13	intronic	RPL37A	10.22	6	T1L10	217245937	218529842	L10
	rs2372958	2	217927074	A	G	2q35	0.7221	0.0363	0.0054	2.059e-11	intergenic	RP11-574O16.1	3.315	5
	rs72957725	2	218469708	T	G	2q35	0.934	0.0569	0.0093	1.129e-09	intergenic	DIRC3	8.169	5
	rs12470153	2	223155911	C	G	2q36.1	0.6756	-0.0339	0.0048	2.899e-12	intronic	PAX3	10.86	2b	T1L11	223110034	223164518	L11
	rs16863657	2	223164518	A	G	2q36.1	0.8521	0.0567	0.0065	3.152e-18	intronic	CCDC140	4.904	4
	rs17010085	3	72708844	C	G	3p13	0.2022	-0.0373	0.0055	1.442e-11	intergenic	RNA5SP136	1.274	4	T1L12	72708844	72708844	L12
	rs7628864	3	86850618	A	G	3p12.1	0.6039	0.0286	0.0046	4.927e-10	intergenic	VGLL3	2.865	7	T1L13	86748563	86947235	L13
	rs146550622	3	190638421	T	C	3q28	0.6221	-0.0345	0.0046	3.631e-14	intergenic	GMNC	1.731	7	T1L14	190592836	190678743	L14
	rs6444749	3	193546238	T	C	3q29	0.5965	-0.0456	0.0045	7.76e-24	intergenic	RP11-528A4.2	4.423	4	T1L15	193533703	193575458	L14
	rs66637342	4	15134147	A	C	4p15.33	0.3815	-0.0399	0.0048	8.264e-17	ncRNA_intronic	RP11-665G4.1	5.887	6	T1L16	14933392	15190356	L15
	rs6849711	4	15150488	T	C	4p15.33	0.2361	-0.0516	0.0052	3.742e-23	ncRNA_intronic	RP11-665G4.1	7.633	5
	rs2703156	4	77938810	T	C	4q21.1	0.414	0.0291	0.0045	1.333e-10	intronic	SEPT11	5.21	NA	T1L17	77888893	77938885	L16
	rs45499402	4	89043634	C	G	4q22.1	0.1576	-0.0579	0.0069	5.254e-17	intronic	ABCG2	0.39	2c	T1L18	88887327	89054667	L17
	rs2935620	5	2685567	A	G	5p15.33	0.3326	0.0336	0.0048	1.721e-12	intergenic	RP11-129I19.2	0.011	6	T1L19	2670593	2686712	L18
	rs1862626	5	56032940	T	G	5q11.2	0.6838	0.0387	0.0048	9.478e-16	intergenic	AC008940.1	2.045	4	T1L20	55998085	56260606	L19
	rs72764483	5	64962816	A	G	5q12.3	0.753	-0.0606	0.0052	1.728e-31	UTR3	SGTB	9.119	7	T1L21	64779214	65083148	L20
	rs2591928	5	65040267	A	G	5q12.3	0.7582	0.0341	0.0052	5.599e-11	intronic	NLN	0.955	5
	rs79460759	5	118513876	A	G	5q23.1	0.0607	-0.0587	0.0096	9.845e-10	exonic (missense)	DMXL1	22.6	7	T1L22	118447516	118530762	L21
	rs155949	5	139523684	A	G	5q31.3	0.4624	-0.0277	0.0045	1.088e-09	intergenic	CTB-131B5.5	13.93	5	T1L23	139517197	139716988	L22
	rs385697	6	7880027	T	C	6p24.3	0.5862	-0.0273	0.0046	2.709e-09	intronic	BMP6	0.223	NA	T1L24	7864764	7907884	L23
	rs9505301	6	7887131	A	G	6p24.3	0.893	-0.0698	0.0072	4.297e-22	intronic	TXNDC5:BLOC1S5-TXNDC5	8.206	4
	rs9396093	6	55310113	T	C	6p12.1	0.7399	0.0341	0.005	1.369e-11	intronic	HMGCLL1	5.188	6	T1L25	55307278	55417699	L24
	rs9398173	6	109000316	T	C	6q21	0.2938	-0.0537	0.0048	1.538e-28	intronic	FOXO3	0.886	6	T1L26	108856378	109020723	L25
	rs12523793	6	149973764	A	G	6q25.1	0.3699	0.0406	0.0048	2.619e-17	intergenic	KATNA1	1.657	7	T1L27	149845350	158781435	L26
	rs73027873	6	158654010	T	C	6q25.3	0.2367	-0.0388	0.0059	5.086e-11	intergenic	SRP72P2	14.46	2b
	rs2639	7	6066461	T	C	7p22.1	0.7628	-0.0415	0.0053	5.55e-15	exonic (synonymous)	EIF2AK1	12.83	4	T1L28	6035948	6118924	L27
	rs12536500	7	50808033	T	C	7p12.1	0.2479	-0.0391	0.0051	1.624e-14	intronic	GRB10	7.681	4	T1L29	50758386	55279470	L28
	rs151057105	7	54944920	T	C	7p11.2	0.0964	0.0477	0.0075	2.696e-10	intergenic	SNORA73	0.322	6
	rs7334	7	55278852	A	C	7p11.2	0.3163	-0.0306	0.005	1.254e-09	UTR3	EGFR	3.472	6
	rs1786341	8	101681104	T	C	8q22.3	0.5548	-0.0279	0.0044	3.306e-10	intergenic	SNX31	0.222	NA	T1L30	101674751	101682208	L29
	rs17659542	8	116594538	T	C	8q23.3	0.1474	0.0385	0.0063	8.544e-10	intronic	TRPS1	18.57	5	T1L31	116481788	116644121	L30
	rs2721943	8	116637999	T	C	8q23.3	0.6222	0.0283	0.0047	1.314e-09	intronic	TRPS1	5.231	6
	rs2173537	8	129047325	A	G	8q24.21	0.1666	-0.046	0.0061	5.04e-14	ncRNA_intronic	PVT1	8.187	4	T1L32	129047325	129047325	L31
	rs7043476	9	14463450	T	C	9p22.3	0.7262	0.034	0.005	1.291e-11	intergenic	NFIB	3.302	6	T1L33	14457576	14464863	L32
	rs985223	9	118935817	A	G	9q33.1	0.5873	-0.0685	0.0047	1.194e-48	intronic	PAPPA	1.769	6	T1L34	118918479	119413366	L33
	rs72754266	9	119093757	A	G	9q33.1	0.0693	0.0647	0.0095	1.152e-11	intronic	PAPPA	6.85	5
	rs2416563	9	119354783	A	G	9q33.1	0.4535	0.0271	0.0044	1.19e-09	intronic	ASTN2	1.839	6
	rs1890966	10	99094436	A	G	10q24.1	0.332	-0.0304	0.0047	1.487e-10	ncRNA_exonic	FRAT2:RP11-452K12.4	11.33	NA	T1L35	98957311	99098702	L34
	rs34377578	10	104336426	A	C	10q24.32	0.7582	0.0365	0.0053	6.203e-12	intronic	SUFU	2.267	5	T1L36	104225941	104392580	L35
	rs3781452	10	126355129	T	C	10q26.13	0.621	-0.0274	0.0046	2.533e-09	intronic	RP11-12J10.3:FAM53B	2.973	NA	T1L37	126337060	126355129	L36
	rs7936371	11	43633339	A	G	11p11.2	0.7725	-0.0373	0.0056	2.501e-11	intergenic	HSD17B12	2.298	5	T1L38	43633339	43870871	L37
	rs12284087	11	68894753	T	C	11q13.3	0.2827	0.0299	0.005	1.83e-09	intergenic	RP11-554A11.7	3.55	5	T1L39	68891695	69510653	L38
	rs4620729	11	68980335	A	C	11q13.3	0.487	0.0505	0.0046	5.414e-28	intergenic	RP11-554A11.8	3.792	5
	rs61881112	11	68988174	A	G	11q13.3	0.925	-0.054	0.0085	2.245e-10	intergenic	RP11-554A11.8	3.493	4
	rs1485995	11	69307707	A	G	11q13.3	0.6809	-0.0324	0.0048	1.364e-11	intergenic	AP000439.3	0.127	NA
	rs1789166	11	69482091	A	C	11q13.3	0.6662	0.0413	0.0048	1.5e-17	UTR3	ORAOV1	0.432	4
	rs562059	11	118602058	T	G	11q23.3	0.6576	0.028	0.0047	2.392e-09	ncRNA_intronic	AP002954.4	0.052	7	T1L40	118602058	118679882	L39
	rs7296881	12	25094536	A	C	12p12.1	0.1521	-0.0434	0.0072	1.494e-09	intronic	BCAT1	3.125	5	T1L41	25070554	25095492	L40
	rs9669354	12	50715252	T	G	12q13.12	0.3463	-0.0309	0.0048	1.747e-10	intergenic	AC140061.2	1.1	7	T1L42	50648830	51217184	L41
	rs2251298	12	102080847	A	T	12q23.2	0.2305	0.0331	0.0053	6.3e-10	intergenic	MYBPC1	1.319	6	T1L43	102080847	107522203	L42
	rs11111090	12	102326461	A	C	12q23.2	0.5398	0.073	0.0045	5.587e-59	intronic	DRAM1	3.741	5
	rs77852696	12	102335417	T	C	12q23.2	0.1163	0.0451	0.007	1.075e-10	intronic	DRAM1	0.649	4
	rs4313630	12	102335984	C	G	12q23.2	0.0651	-0.0643	0.0093	5.669e-12	intronic	DRAM1	7.613	4
	rs10860831	12	102409546	T	G	12q23.2	0.247	0.0498	0.0052	2.076e-21	intronic	CCDC53	0.686	1f
	rs11111293	12	102921296	T	C	12q23.2	0.7863	-0.0487	0.0055	6.219e-19	intergenic	RP11-210L7.1	19.36	2b
	rs10861620	12	106930973	A	C	12q23.3	0.7876	-0.045	0.0056	6.209e-16	intronic	RP11-144F15.1	0.147	6
	rs754184	12	107117521	A	G	12q23.3	0.6587	-0.0451	0.0046	2.066e-22	ncRNA_intronic	RP11-144F15.1:RFX4:RP11-482D24.3	1.09	5
	rs9579179	13	29019720	T	G	13q12.3	0.4484	-0.0278	0.0045	5.208e-10	intronic	FLT1	4.299	6	T1L44	28963283	29019720	L43
	rs2241275	14	75251440	A	G	14q24.3	0.5295	-0.0283	0.0044	1.883e-10	intronic	YLPM1	2.221	1f	T1L45	75120628	75390180	L44
	rs11644675	16	52813601	A	G	16q12.2	0.4553	0.0462	0.0045	1.964e-24	intergenic	RP11-297L17.6	12.39	4	T1L46	52688706	52918140	L45
	rs203465	17	19810720	T	G	17p11.2	0.6249	0.0283	0.0046	1.054e-09	intronic	AKAP10	2.782	NA	T1L47	19804247	19968707	L46
	rs8614	17	27588806	A	C	17q11.2	0.233	-0.0437	0.0056	5.534e-15	UTR3	NUFIP2	13.59	NA	T1L48	27540945	29729207	L46
	rs28623270	17	29389026	A	T	17q11.2	0.8532	-0.0517	0.0067	1.103e-14	ncRNA_intronic	RP11-848P1.9	0.798	4
	rs1635288	17	43756969	A	G	17q21.31	0.2428	-0.0427	0.0064	2.218e-11	ncRNA_intronic	CRHR1:RP11-105N13.4	7.732	NA	T1L49	43463493	46676460	L47
	rs2696422	17	44333889	T	C	17q21.31	0.7828	0.0442	0.0067	3.381e-11	intergenic	RP11-259G18.3	6.777	NA
	rs199517	17	44854587	A	G	17q21.31	0.2947	-0.0358	0.0051	3.326e-12	intronic	WNT3	5.319	5
	rs10853101	17	46676460	A	G	17q21.32	0.7251	0.0291	0.0049	3.891e-09	ncRNA_intronic	HOXB3:HOXB-AS3:HOXB6	4.601	4
	rs470683	18	74681192	A	G	18q23	0.1883	0.0348	0.0059	4.193e-09	UTR3	ZNF236	1.797	5	T1L50	74529551	74681192	L48
	rs1363119	19	18444809	A	G	19p13.11	0.4329	-0.0281	0.0045	4.877e-10	downstream	RN7SL513P	0.712	3a	T1L51	18423238	18444809	L49
	rs6050477	20	25221547	T	C	20p11.21	0.4986	0.0299	0.0046	1.215e-10	intergenic	PYGB	1.079	1f	T1L52	25202892	25667423	L50
	rs6088802	20	33942263	A	G	20q11.22	0.3686	0.0346	0.0046	3.257e-14	intronic	UQCC1	0.064	5	T1L53	33888741	34026138	L51
	rs2206656	20	49130119	C	G	20q13.13	0.627	0.0445	0.0046	1.61e-22	intronic	PTPN1	9.295	5	T1L54	49057488	49210635	L52
	rs12479469	20	61145196	A	G	20q13.33	0.3488	-0.05	0.0048	4.626e-25	ncRNA_exonic	C20orf166-AS1	0.826	NA	T1L55	61141981	61158050	L53
	rs9982271	21	42519389	T	C	21q22.2	0.2112	-0.0367	0.0055	3.367e-11	ncRNA_intronic	LINC00323	6.313	5	T1L56	42513675	42525479	L54
	rs4823044	22	29924825	T	C	22q12.2	0.4134	-0.0265	0.0045	5.243e-09	ncRNA_intronic	THOC5:CTA-256D12.11	3.698	7	T1L57	29924825	29924825	L55
	rs7060542	X	53109075	A	G	Xp11.22	0.1957	0.0316	0.005	3.178e-10	UTR3	GPR173	3.26	5	T1L58	53081785	53165718	L56
Medulla absolute volume	rs142451077	1	6844830	T	G	1p36.31	0.1243	0.0498	0.0074	1.311e-11	UTR3	RP11-312B8.1	15.01	4	T2L1	6802335	7801288	L1
	rs7538105	1	7131336	A	T	1p36.31	0.3416	0.0303	0.0048	2.024e-10	intronic	CAMTA1	19.93	6
	rs3737907	1	7723534	A	G	1p36.23	0.1101	0.0485	0.0083	5.103e-09	exonic (synonymous)	CAMTA1	0.01	1f
	rs12119962	1	7742501	T	C	1p36.23	0.1992	-0.043	0.0058	7.929e-14	intronic	CAMTA1	0.608	5
	rs509345	1	150276022	A	G	1q21.2	0.4968	-0.0307	0.0047	5.143e-11	intronic	MRPS21	16.5	1f	T2L2	150258516	150468359	L57
	rs115823838	1	227303587	T	C	1q42.13	0.0572	0.0613	0.0103	3.012e-09	intronic	CDC42BPA	0.317	6	T2L3	227290669	227597660	L3
	rs9428966	1	243667900	T	G	1q43	0.7306	-0.0342	0.0051	2.267e-11	UTR3	AKT3	12.86	7	T2L4	243663604	243750755	L4
	rs79897806	2	201073968	A	G	2q33.1	0.1729	-0.0386	0.0064	1.668e-09	intergenic	SPATS2L	1.153	5	T2L5	200958303	201108181	L9
	rs16856807	2	217861242	A	G	2q35	0.112	-0.0462	0.0076	1.24e-09	downstream	RP11-574O16.1	3.034	5	T2L6	217858659	217940670	L10
	rs2372958	2	217927074	A	G	2q35	0.7312	0.0508	0.0056	6.337e-20	intergenic	RP11-574O16.1	3.315	5
	rs961848	5	56040949	A	C	5q11.2	0.7463	0.0336	0.0053	2.446e-10	intergenic	AC008940.1	2.031	7	T2L7	56031884	56040949	L19
	rs74873074	5	64956249	A	G	5q12.3	0.7526	-0.0563	0.0053	3.276e-26	intronic	TRAPPC13	4.897	6	T2L8	64779214	65006234	L20
	rs2153960	6	108988184	A	G	6q21	0.7118	0.0416	0.005	4.809e-17	intronic	FOXO3	7.289	4	T2L9	108876002	109019323	L25
	rs34771758	6	126026503	T	C	6q22.31	0.6744	-0.0471	0.0049	1.251e-21	ncRNA_intronic	RP11-624M8.1:RP1-293L8.2	3.687	5	T2L10	125985540	127096527	L58
	rs9388517	6	127095666	A	G	6q22.32	0.7301	-0.0323	0.0052	5.567e-10	intergenic	RPS4XP9	1.113	6
	rs2151909	6	150106569	T	C	6q25.1	0.3829	0.0326	0.0051	1.952e-10	intronic	PCMT1	1.946	6	T2L11	149878896	150157001	L26
	rs42043	7	92247333	A	G	7q21.2	0.7618	-0.0379	0.0054	3.323e-12	intronic	CDK6	7.472	5	T2L12	92239144	92250140	L59
	rs1693560	8	101680292	A	G	8q22.3	0.5296	-0.0278	0.0046	1.133e-09	intergenic	SNX31	3.27	2b	T2L13	101674751	101681104	L29
	rs7048266	9	21160684	C	G	9p21.3	0.427	-0.0304	0.0046	4.053e-11	upstream	Y_RNA	0.605	7	T2L14	21157373	21196978	L60
	rs10983068	9	118918479	T	C	9q33.1	0.5914	-0.0372	0.0048	9.155e-15	intronic	PAPPA	12.33	5	T2L15	118918479	119098518	L33
	rs72754248	9	119061396	A	G	9q33.1	0.0688	0.0625	0.0092	1.113e-11	ncRNA_intronic	PAPPA:RP11-45A16.4	13.23	4
	rs1485995	11	69307707	A	G	11q13.3	0.68	-0.0297	0.0049	1.478e-09	intergenic	AP000439.3	0.127	1b	T2L16	69307707	69453715	L38
	rs667515	11	69449076	C	G	11q13.3	0.3762	-0.0277	0.0047	5.002e-09	intergenic	CCND1	1.999	5
	rs562059	11	118602058	T	G	11q23.3	0.6533	0.0329	0.0048	9.027e-12	ncRNA_intronic	AP002954.4	0.052	7	T2L17	118576463	118679882	L39
	rs1047912	12	51138862	T	C	12q13.12	0.2904	0.0323	0.005	1.444e-10	UTR3	DIP2B	13.97	1f	T2L18	50898728	51205943	L41
	rs11111293	12	102921296	T	C	12q23.2	0.785	-0.0384	0.0056	6.834e-12	intergenic	RP11-210L7.1	19.36	2b	T2L19	102859649	107289513	L42
	rs4964184	12	107070425	A	T	12q23.3	0.6576	-0.0291	0.0048	9.413e-10	intronic	RP11-144F15.1:RFX4	4.659	5
	rs11068773	12	118443690	A	G	12q24.23	0.3732	-0.0279	0.0047	3.532e-09	intergenic	RFC5	1.684	6	T2L20	118440370	118443690	L61
	rs7311684	12	123071365	A	T	12q24.31	0.256	-0.0335	0.0056	1.935e-09	intronic	KNTC1	1.049	6	T2L21	122822009	123116977	L62
	rs36132266	14	69266023	T	G	14q24.1	0.4538	-0.0275	0.0046	1.804e-09	intergenic	ZFP36L1	5.987	7	T2L22	69266023	69279974	L63
	rs8034564	15	99190601	A	G	15q26.3	0.5694	-0.0277	0.0046	2.3e-09	upstream	RP11-35O15.1	4.88	4	T2L23	99165642	99193269	L64
	rs12448813	16	81396574	C	G	16q23.2	0.485	-0.0273	0.0047	5.268e-09	intronic	GAN	0.508	7	T2L24	81370253	81396574	L65
	rs12459368	19	18459377	A	G	19p13.11	0.7075	-0.0429	0.005	7.706e-18	intronic	PGPEP1	1.888	7	T2L25	18449238	18474888	L49
	rs107068	19	36204690	A	G	19q13.12	0.5299	0.0294	0.0046	1.2e-10	intronic	ZBTB32	4.663	1f	T2L26	36150764	36253317	L66
	rs2206656	20	49130119	C	G	20q13.13	0.6285	0.0274	0.0047	4.934e-09	intronic	PTPN1	9.295	5	T2L27	49120296	49155768	L52
	rs12479469	20	61145196	A	G	20q13.33	0.3474	-0.0294	0.0049	1.833e-09	ncRNA_exonic	C20orf166-AS1	0.826	1b	T2L28	61145196	61145196	L53
	rs62606710	X	68377203	T	C	Xq13.1	0.7759	0.0322	0.0046	1.94e-12	intergenic	PJA1	2.428	7	T2L29	68377126	68379039	L67
Medulla relative volume	rs17396382	1	10290268	T	C	1p36.22	0.724	-0.021	0.0033	3.688e-10	intronic	KIF1B	3.773	5	T3L1	10259917	10316025	L68
	rs2372958	2	217927074	A	G	2q35	0.7482	0.023	0.0036	2.575e-10	intergenic	RP11-574O16.1	3.315	5	T3L2	217896403	217927499	L10
	rs58853735	3	48177829	T	C	3p21.31	0.2813	-0.0213	0.0035	1.16e-09	intergenic	RP11-1029M24.1	0.632	5	T3L3	48177829	48177829	L69
	rs17010085	3	72708844	C	G	3p13	0.2033	0.0269	0.0037	3.158e-13	intergenic	RNA5SP136	1.274	4	T3L4	72708844	72708844	L12
	rs13111020	4	14990729	A	G	4p15.33	0.4601	-0.0176	0.003	5.278e-09	ncRNA_intronic	CPEB2-AS1	2.512	6	T3L5	14988889	15147403	L15
	rs2702534	4	15147403	T	C	4p15.33	0.344	0.0204	0.0032	1.672e-10	ncRNA_intronic	RP11-665G4.1	3.611	2b
	rs13328187	5	87865365	T	C	5q14.3	0.7468	-0.0232	0.0035	2.536e-11	ncRNA_intronic	LINC00461	5.957	5	T3L6	87839003	87929869	L70
	rs9505293	6	7870593	T	G	6p24.3	0.1119	-0.0333	0.0048	3.131e-12	intronic	BMP6	0.713	6	T3L7	7870593	7875630	L23
	rs1777220	6	126022602	T	G	6q22.31	0.3781	0.0296	0.0031	4.095e-21	ncRNA_intronic	RP11-624M8.1:RP1-293L8.2	6.933	5	T3L8	125985540	126036184	L58
	rs9403408	6	143166001	A	G	6q24.2	0.711	-0.0221	0.0033	3.794e-11	intronic	HIVEP2	4.262	3a	T3L9	143156096	143206826	L71
	rs151057105	7	54944920	T	C	7p11.2	0.0941	-0.0343	0.0051	1.405e-11	intergenic	SNORA73	0.322	6	T3L10	54931756	54951379	L28
	rs17784801	8	23689495	A	T	8p21.2	0.1869	-0.0234	0.0039	1.815e-09	intergenic	STC1	1.044	7	T3L11	23686374	23694424	L72
	rs7048266	9	21160684	C	G	9p21.3	0.4294	-0.0212	0.003	1.787e-12	upstream	Y_RNA	0.605	7	T3L12	21157373	21193780	L60
	rs7850952	9	119200847	A	C	9q33.1	0.2804	-0.0228	0.0033	9.505e-12	intronic	ASTN2	10.86	4	T3L13	119166493	119482839	L33
	rs803903	9	119434290	A	G	9q33.1	0.3164	0.0263	0.0032	4.551e-16	intronic	ASTN2	10.22	4
	rs11245338	10	126393943	A	C	10q26.13	0.6387	-0.0187	0.0031	1.52e-09	ncRNA_intronic	RP11-12J10.3:FAM53B:FAM53B-AS1	4.027	4	T3L14	126387138	126412323	L36
	rs61938211	12	102222490	T	C	12q23.2	0.1632	-0.025	0.0041	8.226e-10	intronic	GNPTAB	0.945	5	T3L15	102192132	102848246	L42
	rs79425770	12	102323794	T	G	12q23.2	0.0993	-0.0297	0.0051	5.524e-09	intronic	DRAM1	4.631	4
	rs11111088	12	102324872	T	C	12q23.2	0.5317	-0.0443	0.003	1.109e-48	intronic	DRAM1	2.143	5
	rs75439851	12	102436543	T	C	12q23.2	0.14	-0.0727	0.0093	7.325e-15	intronic	CCDC53	1.641	7
	rs13339449	16	52809703	T	C	16q12.2	0.4434	-0.0195	0.003	1.222e-10	intergenic	RP11-297L17.6	0.094	6	T3L16	52805172	52871674	L45
	rs2525096	17	46076965	A	G	17q21.32	0.736	-0.0233	0.0034	5.011e-12	intergenic	RP11-6N17.10	1.221	4	T3L17	46045484	46625519	L47
	rs8067216	17	46088197	A	G	17q21.32	0.2886	-0.0257	0.0034	3.947e-14	intergenic	RP11-6N17.10	0.214	6
	rs999493	17	46625519	A	G	17q21.32	0.6047	-0.0248	0.0031	8.327e-16	ncRNA_intronic	HOXB-AS1	19.79	3a
	rs12327278	18	38011902	T	C	18q12.3	0.2157	-0.0257	0.0038	9.609e-12	intergenic	RNU7-145P	10.39	4	T3L18	38001132	38011902	L73
	rs1903683	18	49179005	T	G	18q21.2	0.3737	0.0195	0.0031	5.534e-10	intergenic	RP11-440L16.1	3.742	6	T3L19	49162801	49179151	L74
	rs12459965	19	18452195	T	C	19p13.11	0.2862	0.0272	0.0033	4.725e-16	intronic	PGPEP1	10.24	3a	T3L20	18449238	18471610	L49
Pons absolute volume	rs3789586	1	51054322	T	C	1p32.3	0.1519	0.0482	0.0068	1.344e-12	intronic	FAF1	3.193	7	T4L1	50950806	51118253	L2
	rs6593920	1	205037676	T	G	1q32.1	0.5599	-0.0343	0.0051	1.298e-11	intronic	CNTN2	1.19	1f	T4L2	205036040	205220241	L75
	rs1172155	1	205220241	T	C	1q32.1	0.1215	-0.0467	0.0077	1.583e-09	intronic	TMCC2	6.562	1f
	rs9428966	1	243667900	T	G	1q43	0.7301	-0.0332	0.0055	1.49e-09	UTR3	AKT3	12.86	7	T4L3	243663604	243672074	L4
	rs55795022	2	16386265	A	T	2p24.3	0.1719	-0.0554	0.0077	4.825e-13	downstream	AC010745.1	16.11	5	T4L4	16386265	16609693	L5
	rs75619419	2	16434813	T	C	2p24.3	0.0607	0.0713	0.0106	1.551e-11	intergenic	AC010745.2	3.18	5
	rs1560368	2	16604293	T	C	2p24.3	0.1859	-0.0452	0.0064	1.351e-12	ncRNA_intronic	AC010880.1	5.564	5
	rs13388394	2	33764176	A	G	2p22.3	0.9582	-0.0868	0.0129	1.878e-11	exonic (missense)	RASGRP3	17.72	7	T4L5	33755460	33787708	L6
	rs62157778	2	88934090	A	G	2p11.2	0.3065	0.0526	0.0053	5.3e-23	intergenic	AC062029.1	3.984	6	T4L6	88840761	89092696	L7
	rs13028842	2	177042261	A	G	2q31.1	0.749	-0.0403	0.0059	1.16e-11	ncRNA_exonic	HOXD-AS1	7.551	4	T4L7	177004026	177042261	L8
	rs2666289	2	217261397	T	C	2q35	0.6622	-0.0313	0.0052	1.529e-09	ncRNA_intronic	AC098820.2	1.55	1b	T4L8	217261397	217940670	L10
	rs12472626	2	217940670	A	G	2q35	0.2543	-0.0402	0.0065	6.113e-10	intergenic	RP11-574O16.1	3.959	7
	rs12470153	2	223155911	C	G	2q36.1	0.6788	-0.042	0.0054	7.96e-15	intronic	PAX3	10.86	2b	T4L9	223155911	223164518	L11
	rs16863657	2	223164518	A	G	2q36.1	0.8522	0.0708	0.0073	2.878e-22	intronic	CCDC140	4.904	4
	rs62252218	3	69882568	T	C	3p13	0.2094	0.0392	0.0065	1.309e-09	intronic	MITF	0.233	5	T4L10	69861228	69906503	L76
	rs17010085	3	72708844	C	G	3p13	0.2027	-0.0508	0.0061	1.338e-16	intergenic	RNA5SP136	1.274	4	T4L11	72708844	72708844	L12
	rs12495229	3	86852024	T	G	3p12.1	0.3973	-0.0314	0.005	3.83e-10	intergenic	VGLL3	0.477	5	T4L12	86767562	86947235	L13
	rs1426383	3	152016969	T	C	3q25.1	0.3239	0.032	0.0053	1.266e-09	intronic	MBNL1	22	1f	T4L13	151990779	152075781	L77
	rs6444749	3	193546238	T	C	3q29	0.5968	-0.0504	0.005	3.388e-24	intergenic	RP11-528A4.2	4.423	4	T4L14	193536382	193549449	L14
	rs903480	4	14965664	C	G	4p15.33	0.5092	0.0293	0.005	5.362e-09	ncRNA_intronic	CPEB2-AS1	4.928	6	T4L15	14965664	15151677	L15
	rs13136309	4	15134596	T	C	4p15.33	0.6123	0.0413	0.0054	1.727e-14	ncRNA_intronic	RP11-665G4.1	5.315	4
	rs10027331	4	15149569	A	G	4p15.33	0.2378	-0.0604	0.0058	1.039e-25	ncRNA_intronic	RP11-665G4.1	5.293	4
	rs2703156	4	77938810	T	C	4q21.1	0.4148	0.0335	0.005	3.181e-11	intronic	SEPT11	5.21	1f	T4L16	77882153	77938885	L16
	rs45499402	4	89043634	C	G	4q22.1	0.1639	-0.0568	0.0075	4.989e-14	intronic	ABCG2	0.39	2c	T4L17	89019735	89054667	L17
	rs2935620	5	2685567	A	G	5p15.33	0.3318	0.04	0.0053	5.493e-14	intergenic	RP11-129I19.2	0.011	6	T4L18	2670593	2687755	L18
	rs6450401	5	56033234	C	G	5q11.2	0.6788	0.0384	0.0053	4.671e-13	intergenic	AC008940.1	7.027	4	T4L19	56025716	56041064	L19
	rs72764483	5	64962816	A	G	5q12.3	0.7549	-0.0503	0.0057	1.7e-18	UTR3	SGTB	9.119	7	T4L20	64779214	65083000	L20
	rs2561229	5	65040445	A	G	5q12.3	0.2437	-0.0394	0.0057	7.332e-12	intronic	NLN	1.142	6
	rs155949	5	139523684	A	G	5q31.3	0.4607	-0.0308	0.0051	1.427e-09	intergenic	CTB-131B5.5	13.93	5	T4L21	139517197	139529987	L22
	rs3734589	6	7891775	A	G	6p24.3	0.0969	0.0864	0.0083	1.539e-25	intronic	TXNDC5:BLOC1S5-TXNDC5	13.34	3a	T4L22	7887670	7898147	L23
	rs9396093	6	55310113	T	C	6p12.1	0.7387	0.0372	0.0056	3.761e-11	intronic	HMGCLL1	5.188	6	T4L23	55307278	55717728	L24
	rs9475432	6	55715504	A	C	6p12.1	0.4389	-0.0331	0.005	3.439e-11	intronic	BMP5	0.968	6
	rs3800228	6	108996748	T	G	6q21	0.2804	-0.0487	0.0055	4.608e-19	intronic	FOXO3	4.831	5	T4L24	108876002	109019323	L25
	rs12523793	6	149973764	A	G	6q25.1	0.3759	0.0409	0.0053	1.901e-14	intergenic	KATNA1	1.657	7	T4L25	149845350	158781435	L26
	rs73027873	6	158654010	T	C	6q25.3	0.2473	-0.0451	0.0065	4.248e-12	intergenic	SRP72P2	14.46	2b
	rs41282676	7	6086610	C	G	7p22.1	0.8182	-0.0784	0.01	5.686e-15	intronic	EIF2AK1	0.604	5	T4L26	6035948	6116937	L27
	rs12536500	7	50808033	T	C	7p12.1	0.2487	-0.0429	0.0056	1.768e-14	intronic	GRB10	7.681	4	T4L27	50770629	55279470	L28
	rs940808	7	55279470	C	G	7p11.2	0.3219	-0.0332	0.0056	4.232e-09	intronic	EGFR	0.439	5
	rs425312	8	90846355	T	C	8q21.3	0.4168	-0.0298	0.0051	4.604e-09	intergenic	COX6B1P6	6.448	6	T4L28	90846042	90870028	L78
	rs2737226	8	116639474	T	C	8q23.3	0.3772	-0.0328	0.0052	3.565e-10	intronic	TRPS1	7.894	7	T4L29	116498798	116644121	L30
	rs2173537	8	129047325	A	G	8q24.21	0.1608	-0.0595	0.007	1.584e-17	ncRNA_intronic	PVT1	8.187	4	T4L30	129047325	129047325	L31
	rs7043476	9	14463450	T	C	9p22.3	0.7271	0.0422	0.0056	3.597e-14	intergenic	NFIB	3.302	6	T4L31	14453010	14762700	L32
	rs12685742	9	14762700	T	C	9p22.3	0.5812	-0.0303	0.0051	2.136e-09	intronic	FREM1	5.107	6
	rs1160248	9	118944239	T	C	9q33.1	0.5848	-0.0746	0.0052	2.837e-46	intronic	PAPPA	7.023	5	T4L32	118918479	119447750	L33
	rs2416563	9	119354783	A	G	9q33.1	0.4534	0.0377	0.0049	1.113e-14	intronic	ASTN2	1.839	6
	rs12762934	10	104359884	T	C	10q24.32	0.3111	-0.0326	0.0054	1.076e-09	intronic	SUFU	10.59	2b	T4L33	104299191	104378688	L35
	rs3781458	10	126343931	T	C	10q26.13	0.6204	-0.0303	0.0051	2.806e-09	intronic	RP11-12J10.3:FAM53B	6.144	1b	T4L34	126338093	126355129	L36
	rs4072598	11	68959689	A	C	11q13.3	0.4993	-0.0284	0.0049	5.315e-09	intergenic	RP11-554A11.8	14.77	1f	T4L35	68959689	69509343	L38
	rs61881112	11	68988174	A	G	11q13.3	0.9241	-0.0623	0.0093	2.558e-11	intergenic	RP11-554A11.8	3.493	4
	rs10896449	11	68994667	A	G	11q13.3	0.5141	-0.057	0.0051	2.675e-29	intergenic	RP11-554A11.8	2.184	7
	rs1789166	11	69482091	A	C	11q13.3	0.6626	0.0417	0.0053	3.746e-15	UTR3	ORAOV1	0.432	4
	rs9668831	12	102083778	A	C	12q23.2	0.3896	0.0361	0.005	6.422e-13	intergenic	MYBPC1	2.392	7	T4L36	102080976	107239947	L42
	rs11111054	12	102235258	T	C	12q23.2	0.8392	-0.049	0.0067	2.956e-13	intergenic	RNA5SP369	5.575	7
	rs61100438	12	102295834	A	G	12q23.2	0.1551	0.0409	0.0068	2.277e-09	intronic	DRAM1	2.611	5
	rs11111090	12	102326461	A	C	12q23.2	0.5431	0.0916	0.005	2.056e-76	intronic	DRAM1	3.741	5
	rs77852696	12	102335417	T	C	12q23.2	0.114	0.0488	0.0079	6.38e-10	intronic	DRAM1	0.649	4
	rs4313630	12	102335984	C	G	12q23.2	0.0642	-0.0834	0.0105	1.7e-15	intronic	DRAM1	7.613	4
	rs10860831	12	102409546	T	G	12q23.2	0.2511	0.0593	0.0057	3.825e-25	intronic	CCDC53	0.686	1f
	rs11111293	12	102921296	T	C	12q23.2	0.7871	-0.0585	0.0061	1.543e-21	intergenic	RP11-210L7.1	19.36	2b
	rs61943693	12	106812410	A	G	12q23.3	0.1846	0.0455	0.0066	4.938e-12	intronic	POLR3B	17.22	2b
	rs1922432	12	107077232	A	G	12q23.3	0.3454	0.0501	0.0052	2.578e-22	ncRNA_intronic	RP11-144F15.1:RFX4:RP11-482D24.2	3.172	5
	rs9579179	13	29019720	T	G	13q12.3	0.4448	-0.0299	0.005	2.108e-09	intronic	FLT1	4.299	6	T4L37	29019720	29019720	L43
	rs2241275	14	75251440	A	G	14q24.3	0.5293	-0.0306	0.0049	3.522e-10	intronic	YLPM1	2.221	1f	T4L38	75120628	75390180	L44
	rs4784238	16	52709377	T	C	16q12.2	0.5353	-0.0332	0.0049	1.225e-11	intergenic	RP11-297L17.6	4.002	5	T4L39	52688706	52873960	L45
	rs11644675	16	52813601	A	G	16q12.2	0.463	0.0538	0.0051	3.04e-26	intergenic	RP11-297L17.6	12.39	4
	rs1638526	17	19848450	T	C	17p11.2	0.7459	0.0333	0.0057	5.192e-09	intronic	AKAP10	3.177	1f	T4L40	19806223	19861142	L46
	rs8614	17	27588806	A	C	17q11.2	0.2407	-0.0381	0.0062	6.052e-10	UTR3	NUFIP2	13.59	1f	T4L41	27588806	27588980	L46
	rs28623270	17	29389026	A	T	17q11.2	0.8556	-0.0521	0.0075	3.683e-12	ncRNA_intronic	RP11-848P1.9	0.798	4	T4L42	29266780	29396297	L46
	rs754593	17	44054696	A	G	17q21.31	0.6133	0.0366	0.0051	8.557e-13	UTR5	MAPT	5.36	4	T4L43	44054696	46672716	L79
	rs9912530	17	44836302	T	C	17q21.31	0.3271	-0.0321	0.0055	3.881e-09	intergenic	NSF	0.362	4
	rs34822124	17	46648679	T	G	17q21.32	0.1865	-0.0455	0.007	8.087e-11	ncRNA_intronic	HOXB3:HOXB-AS3	2.744	2b
	rs7406417	17	79552829	A	C	17q25.3	0.7359	0.0384	0.0063	9.523e-10	intronic	NPLOC4	13.92	7	T4L44	79552829	79585511	L80
	rs16973299	18	38004201	A	G	18q12.3	0.2466	0.0395	0.0061	9.98e-11	intergenic	RNU7-145P	0.047	7	T4L45	38001132	38011902	L73
	rs3213141	20	32274380	A	G	20q11.22	0.2707	-0.0329	0.0056	3.125e-09	upstream	E2F1	19.89	1a	T4L46	32131089	32274380	L81
	rs6142373	20	33983314	A	T	20q11.22	0.6408	-0.0373	0.0054	4.805e-12	intronic	UQCC1	1.2	5	T4L47	33890061	34026138	L51
	rs6020566	20	49123032	A	G	20q13.13	0.6304	0.0416	0.0051	2.173e-16	intergenic	PTPN1	0.774	4	T4L48	49115218	49185423	L52
	rs12479469	20	61145196	A	G	20q13.33	0.3509	-0.0396	0.0052	4.44e-14	ncRNA_exonic	C20orf166-AS1	0.826	1b	T4L49	61145196	61145196	L53
	rs35335714	21	42517341	T	C	21q22.2	0.7879	0.0377	0.0061	5.556e-10	ncRNA_intronic	LINC00323	3.925	5	T4L50	42516327	42525479	L54
	rs28368435	22	46406695	A	G	22q13.31	0.4206	0.0352	0.0051	7.179e-12	intergenic	CITF22-92A6.1	0.064	5	T4L51	46401657	46409177	L82
	rs5933621	X	53129352	C	G	Xp11.22	0.185	0.0305	0.0052	3.707e-09	ncRNA_intronic	LINC01155	0.777	7	T4L52	53109075	53165718	L56
Pons relative volume	rs57948772	1	18919348	T	C	1p36.13	0.342	0.0075	0.0012	3.373e-10	intergenic	RP1-8B22.2	3.227	5	T5L1	18905366	18943063	L83
	rs4660585	1	42393001	A	G	1p34.2	0.7438	-0.0092	0.0013	1.122e-12	intergenic	HIVEP3	0.607	2b	T5L2	42373900	42570834	L84
	rs6593920	1	205037676	T	G	1q32.1	0.5515	-0.008	0.0012	1.583e-11	intronic	CNTN2	1.19	1f	T5L3	205036040	205265370	L75
	rs1172123	1	205261427	C	G	1q32.1	0.8768	0.0105	0.0017	4.363e-10	intergenic	NUAK2	0.363	5
	rs75619419	2	16434813	T	C	2p24.3	0.0608	0.0168	0.0024	1.349e-12	intergenic	AC010745.2	3.18	5	T5L4	16422637	16620803	L5
	rs34137698	2	16610776	A	G	2p24.3	0.7912	0.0098	0.0014	9.178e-13	ncRNA_intronic	AC010880.1	0.028	5
	rs67435554	2	177007102	T	G	2q31.1	0.1024	-0.0125	0.0021	1.789e-09	intronic	HOXD3	1.207	5	T5L5	177007102	177007102	L8
	rs16863657	2	223164518	A	G	2q36.1	0.8627	0.0133	0.0017	6.003e-15	intronic	CCDC140	4.904	4	T5L6	223164518	223164518	L11
	rs924754	3	15756215	A	T	3p25.1	0.4109	0.0075	0.0012	7.103e-11	intronic	ANKRD28	3.95	4	T5L7	15706124	15942354	L85
	rs17010085	3	72708844	C	G	3p13	0.2033	-0.0121	0.0014	4.447e-19	intergenic	RNA5SP136	1.274	4	T5L8	72708844	72708844	L12
	rs6849711	4	15150488	T	C	4p15.33	0.2425	-0.0098	0.0013	1.777e-14	ncRNA_intronic	RP11-665G4.1	7.633	5	T5L9	15149569	15151483	L15
	rs417897	5	2523577	T	C	5p15.33	0.3211	0.0073	0.0012	2.198e-10	intergenic	RP11-129I19.2	1.937	5	T5L10	2523166	2685812	L18
	rs2935618	5	2683885	T	C	5p15.33	0.3389	0.0076	0.0012	1.162e-10	intergenic	RP11-129I19.2	0.021	5
	rs3734589	6	7891775	A	G	6p24.3	0.0935	0.0156	0.0019	2.752e-16	intronic	TXNDC5:BLOC1S5-TXNDC5	13.34	3a	T5L11	7887670	7898147	L23
	rs9265711	6	31301905	A	G	6p21.33	0.6065	-0.0067	0.0012	4.997e-09	intergenic	LINC02571	7.415	7	T5L12	31301905	31457049	L86
	rs2523698	6	31453884	T	G	6p21.33	0.2884	-0.0083	0.0013	3.867e-11	ncRNA_intronic	MICB-DT	4.562	1f
	rs7767129	6	55315954	A	T	6p12.1	0.2532	-0.0083	0.0012	3.752e-11	intronic	HMGCLL1	2.054	6	T5L13	55307278	55717728	L24
	rs3798825	6	55716630	A	G	6p12.1	0.5496	0.0075	0.0012	1.31e-10	intronic	BMP5	3.383	6
	rs2294405	6	99292136	A	G	6q16.1	0.3539	-0.0084	0.0012	3.591e-13	intergenic	POU3F2	19.22	1f	T5L14	99284532	109492606	L25
	rs9495326	6	100178549	A	T	6q16.2	0.3395	-0.0087	0.0012	8.605e-14	intergenic	Y_RNA	1.349	7
	rs12213228	6	109369169	A	G	6q21	0.8906	0.0114	0.0019	9.94e-10	intronic	SESN1	2.446	7
	rs6569437	6	126034540	T	G	6q22.31	0.6402	0.0098	0.0012	7.14e-17	ncRNA_intronic	RP11-624M8.1:RP1-293L8.2	2.554	5	T5L15	125985934	126045560	L58
	rs1909457	8	129031617	T	C	8q24.21	0.635	-0.0075	0.0012	1.312e-10	ncRNA_intronic	PVT1	3.506	4	T5L16	129031617	129047325	L31
	rs2173537	8	129047325	A	G	8q24.21	0.1607	-0.0111	0.0016	8.211e-13	ncRNA_intronic	PVT1	8.187	4
	rs192769	9	14466057	T	C	9p22.3	0.2032	-0.01	0.0014	3.028e-13	intergenic	RP11-408A13.2	0.08	4	T5L17	14453010	14757877	L32
	rs7864052	9	14757877	A	C	9p22.3	0.578	0.0075	0.0012	1.624e-10	intronic	FREM1	11.44	7
	rs10821139	9	96249133	T	G	9q22.31	0.3407	-0.0076	0.0012	5.138e-11	intronic	FAM120A	4.399	5	T5L18	96183521	96343060	L87
	rs387747	9	118977687	T	G	9q33.1	0.5629	-0.007	0.0012	2.865e-09	intronic	PAPPA	2.991	7	T5L19	118957629	119458684	L33
	rs17302434	9	119155732	T	C	9q33.1	0.8995	0.0108	0.0018	2.999e-09	intronic	PAPPA	3.126	7
	rs811458	9	119405271	T	C	9q33.1	0.3076	-0.0121	0.0012	8.681e-25	intronic	ASTN2	4.455	7
	rs7929962	11	68985583	T	C	11q13.3	0.4958	0.0092	0.0011	2.864e-17	intergenic	RP11-554A11.8	1.405	4	T5L20	68972657	69012244	L38
	rs61881112	11	68988174	A	G	11q13.3	0.9224	-0.0122	0.0021	3.344e-09	intergenic	RP11-554A11.8	3.493	4
	rs56098072	12	54501180	T	C	12q13.13	0.923	0.0128	0.0021	6.546e-10	ncRNA_intronic	RP11-834C11.3:RP11-834C11.5	9.473	4	T5L21	54491637	54502283	L88
	rs10860214	12	97860829	A	G	12q23.1	0.1867	-0.0091	0.0014	3.441e-10	ncRNA_intronic	RMST	6.298	7	T5L22	97858656	97868510	L89
	rs2114918	12	102084518	T	C	12q23.2	0.6222	-0.0084	0.0012	2.418e-13	intergenic	MYBPC1	14.76	1a	T5L23	102081498	106835114	L42
	rs11111017	12	102166802	T	C	12q23.2	0.8273	-0.0109	0.0015	2.527e-12	intronic	GNPTAB	0.828	7
	rs11111054	12	102235258	T	C	12q23.2	0.8375	-0.0115	0.0016	1.414e-13	intergenic	RNA5SP369	5.575	7
	rs140811937	12	102319618	A	G	12q23.2	0.0666	0.0151	0.0023	4.806e-11	intronic	DRAM1	1.554	5
	rs11111094	12	102328806	A	C	12q23.2	0.4651	-0.0212	0.0012	1.904e-73	intronic	DRAM1	2.82	4
	rs76197610	12	102338012	T	C	12q23.2	0.9061	-0.0118	0.002	2.098e-09	intronic	DRAM1	3.712	6
	rs7971939	12	102407432	A	T	12q23.2	0.7636	-0.0118	0.0013	8.027e-19	intronic	CCDC53	0.705	6
	rs4764895	12	102909079	C	G	12q23.2	0.146	0.0223	0.0035	1.151e-10	intergenic	RP11-210L7.1	0.14	6
	rs11611815	12	106749608	A	C	12q23.3	0.7703	-0.0082	0.0014	3.446e-09	intergenic	POLR3B	1.898	7
	rs12050391	14	32771346	A	C	14q12	0.2369	0.0082	0.0013	1.297e-09	intergenic	AKAP6	2.374	5	T5L24	32736459	32771346	L90
	rs45465998	16	52583410	A	G	16q12.1	0.2619	0.0079	0.0012	1.755e-10	intergenic	TOX3	0.642	5	T5L25	52572029	52871674	L45
	rs13339449	16	52809703	T	C	16q12.2	0.4445	0.0116	0.0012	5.767e-23	intergenic	RP11-297L17.6	0.094	6
	rs4795388	17	37767453	A	G	17q12	0.2832	-0.0076	0.0012	9.934e-10	intergenic	NEUROD2	5.321	5	T5L26	37761185	37831297	L47
	rs4794333	17	46045495	T	C	17q21.32	0.6009	-0.0073	0.0012	9.344e-10	ncRNA_intronic	RP11-6N17.9:CDK5RAP3	9.744	4	T5L27	46045495	46687752	L79
	rs8438	17	46147945	A	G	17q21.32	0.2503	-0.0105	0.0013	3.943e-17	UTR3	CBX1	3.77	1f
	rs34822124	17	46648679	T	G	17q21.32	0.1905	-0.0136	0.0015	5.639e-20	ncRNA_intronic	HOXB3:HOXB-AS3	2.744	2b
	rs12967855	18	35138245	A	G	18q12.2	0.326	0.0082	0.0012	2.063e-12	intronic	CELF4	0.424	5	T5L28	35127427	35204858	L91
	rs9952030	18	37940395	A	G	18q12.3	0.676	0.0072	0.0012	7.844e-10	intergenic	RNU7-145P	8.422	5	T5L29	37940395	38011902	L73
	rs12327278	18	38011902	T	C	18q12.3	0.2157	0.0146	0.0014	6.938e-25	intergenic	RNU7-145P	10.39	4
	rs35343344	19	18471610	A	C	19p13.11	0.2775	-0.0079	0.0012	2.307e-10	intronic	PGPEP1	3.995	6	T5L30	18471610	18471610	L49
	rs6046627	20	20086530	A	G	20p11.23	0.2679	0.0088	0.0013	1.514e-11	intronic	C20orf26	0.303	6	T5L31	20071332	20086530	L92
	rs28491012	22	46402436	A	T	22q13.31	0.6082	-0.0071	0.0012	1.412e-09	intergenic	CITF22-92A6.1	6.54	2b	T5L32	46401657	46402436	L82
Midbrain absolute volume	rs509345	1	150276022	A	G	1q21.2	0.4921	-0.0264	0.0044	1.339e-09	intronic	MRPS21	16.5	1f	T6L1	150258516	150468110	L57
	rs9428966	1	243667900	T	G	1q43	0.7302	-0.0329	0.0048	4.055e-12	UTR3	AKT3	12.86	7	T6L2	243659727	243750755	L4
	rs13428482	2	33768347	C	G	2p22.3	0.8462	-0.0392	0.0062	2.44e-10	intronic	RASGRP3	1.912	7	T6L3	33740855	33770403	L6
	rs1426383	3	152016969	T	C	3q25.1	0.3232	0.0302	0.0045	3.134e-11	intronic	MBNL1	22	1f	T6L4	151990779	152085277	L77
	rs78054167	3	190655759	A	T	3q28	0.6478	-0.0291	0.0049	2.149e-09	intergenic	GMNC	1.064	6	T6L5	190595456	193547618	L14
	rs6444748	3	193541025	A	C	3q29	0.444	0.0264	0.0044	2.517e-09	intergenic	RP11-528A4.2	1.928	3a
	rs45499402	4	89043634	C	G	4q22.1	0.1629	-0.0384	0.0065	4.362e-09	intronic	ABCG2	0.39	2c	T6L6	89043634	89043634	L17
	rs889312	5	56031884	A	C	5q11.2	0.6822	0.0293	0.0046	1.629e-10	intergenic	AC008940.1	20.1	3a	T6L7	56031884	56041064	L19
	rs117906798	5	64918015	T	C	5q12.3	0.754	-0.0459	0.005	2.776e-20	intronic	TRIM23	6.449	6	T6L8	64779214	65062842	L20
	rs2561229	5	65040445	A	G	5q12.3	0.2438	-0.0317	0.005	1.902e-10	intronic	NLN	1.142	6
	rs155949	5	139523684	A	G	5q31.3	0.461	-0.0316	0.0044	8.187e-13	intergenic	CTB-131B5.5	13.93	5	T6L9	139517197	139543091	L22
	rs2153960	6	108988184	A	G	6q21	0.7127	0.0437	0.0046	2.734e-21	intronic	FOXO3	7.289	4	T6L10	108876002	109019323	L25
	rs6939969	6	126034563	T	C	6q22.31	0.3544	0.0262	0.0045	5.257e-09	ncRNA_intronic	RP11-624M8.1:RP1-293L8.2	5.266	5	T6L11	125994754	126034563	L58
	rs12523793	6	149973764	A	G	6q25.1	0.3744	0.0354	0.0046	1.188e-14	intergenic	KATNA1	1.657	7	T6L12	149845350	150180259	L26
	rs151057105	7	54944920	T	C	7p11.2	0.0957	0.0705	0.0072	1.122e-22	intergenic	SNORA73	0.322	6	T6L13	54931756	55279470	L28
	rs12669020	7	55025372	A	G	7p11.2	0.6506	0.0293	0.0045	1.16e-10	intergenic	RP4-791C19.1	1.753	7
	rs6593211	7	55277964	A	G	7p11.2	0.3218	-0.0304	0.0048	2.572e-10	UTR3	EGFR	0.071	6
	rs42039	7	92244422	T	C	7q21.2	0.24	0.0313	0.0053	2.726e-09	UTR3	CDK6	1.244	5	T6L14	92244422	92277477	L59
	rs1693560	8	101680292	A	G	8q22.3	0.5277	-0.0326	0.0042	1.247e-14	intergenic	SNX31	3.27	2b	T6L15	101673265	101681104	L29
	rs1160248	9	118944239	T	C	9q33.1	0.586	-0.0406	0.0045	8.333e-20	intronic	PAPPA	7.023	5	T6L16	118918479	119098518	L33
	rs72754248	9	119061396	A	G	9q33.1	0.0684	0.0544	0.0087	3.753e-10	ncRNA_intronic	PAPPA:RP11-45A16.4	13.23	4
	rs10786333	10	99090390	A	G	10q24.1	0.6095	0.0288	0.0043	3.118e-11	intergenic	FRAT2	3.421	7	T6L17	99083760	99094436	L34
	rs7936371	11	43633339	A	G	11p11.2	0.7775	-0.0316	0.0054	4.772e-09	intergenic	HSD17B12	2.298	5	T6L18	43633339	43635626	L37
	rs11111090	12	102326461	A	C	12q23.2	0.5426	0.0278	0.0043	8.98e-11	intronic	DRAM1	3.741	5	T6L19	102324872	102338295	L42
	rs9507115	13	24113622	T	C	13q12.12	0.4111	0.0257	0.0044	3.745e-09	intergenic	TNFRSF19	3.857	6	T6L20	24113622	24139505	L93
	rs179744	14	31496212	T	C	14q12	0.4684	0.0298	0.0042	1.197e-12	UTR5	AP4S1	5.937	1f	T6L21	31361742	31505048	L94
	rs184867122	14	53766575	A	C	14q22.1	0.7448	0.0335	0.0051	4.202e-11	ncRNA_intronic	AL163953.3	0.945	7	T6L22	53766575	53797525	L95
	rs7402982	15	99193269	A	G	15q26.3	0.4322	0.0293	0.0044	2.353e-11	intronic	IGF1R	7.74	4	T6L23	99177652	99193276	L64
	rs203469	17	19806404	T	C	17p11.2	0.6234	0.0282	0.0044	1.774e-10	intergenic	AKAP10	2.254	1f	T6L24	19804247	29396297	L46
	rs28623270	17	29389026	A	T	17q11.2	0.8556	-0.0408	0.0065	3.28e-10	ncRNA_intronic	RP11-848P1.9	0.798	4
	rs62066672	17	43200993	A	G	17q21.31	0.1822	-0.0361	0.0057	2.391e-10	intronic	PLCD3	5.841	2b	T6L25	43197085	44865498	L79
	rs1635288	17	43756969	A	G	17q21.31	0.2432	-0.0382	0.0052	1.636e-13	ncRNA_intronic	CRHR1:RP11-105N13.4	7.732	1f
	rs2696422	17	44333889	T	C	17q21.31	0.7824	0.0384	0.0054	9.491e-13	intergenic	RP11-259G18.3	6.777	1f
	rs2426156	20	49135299	T	G	20q13.13	0.6615	0.0292	0.0044	4.957e-11	intronic	PTPN1	4.458	5	T6L26	49119556	49205492	L52
	rs12479469	20	61145196	A	G	20q13.33	0.3505	-0.0466	0.0045	6.256e-25	ncRNA_exonic	C20orf166-AS1	0.826	1b	T6L27	61142975	61190367	L53
	rs6143044	20	61166909	A	C	20q13.33	0.1946	0.0368	0.0054	7.105e-12	intronic	C20orf166	2.493	1f
	rs35335714	21	42517341	T	C	21q22.2	0.7878	0.0316	0.0053	2.594e-09	ncRNA_intronic	LINC00323	3.925	5	T6L28	42515277	42525479	L54
	rs2885287	X	68377499	A	G	Xq13.1	0.228	-0.0297	0.0042	2.772e-12	intergenic	PJA1	3.898	1f	T6L29	68377126	68379039	L67
Midbrain relative volume	rs651529	1	244452911	A	G	1q44	0.5034	0.0136	0.0022	1.19e-09	intergenic	C1orf100	3.586	7	T7L1	244452911	244452911	L4
	rs55795022	2	16386265	A	T	2p24.3	0.1718	0.0269	0.0034	1.928e-15	downstream	AC010745.1	16.11	5	T7L2	16386265	16617085	L5
	rs116784386	2	16457697	C	G	2p24.3	0.0666	-0.029	0.0046	2.018e-10	intergenic	AC010745.4	0.008	7
	rs6706856	2	16615530	T	C	2p24.3	0.2106	0.0171	0.0028	8.354e-10	intergenic	AC010880.1	3.697	5
	rs12615303	2	27140573	T	C	2p23.3	0.367	0.0131	0.0022	5.279e-09	intronic	DPYSL5	1.476	7	T7L3	27126557	27153095	L96
	rs16863657	2	223164518	A	G	2q36.1	0.8534	-0.0191	0.0033	4.955e-09	intronic	CCDC140	4.904	4	T7L4	223164518	223164518	L11
	rs1431071	2	226353554	T	G	2q36.3	0.3007	0.0175	0.0023	9.653e-14	intronic	NYAP2	5.84	1f	T7L5	226353554	226360417	L97
	rs843353	3	183978781	T	C	3q27.1	0.7505	-0.0149	0.0025	3.699e-09	intronic	EIF2B5:ECE2:CAMK2N2	10.32	1f	T7L6	183941428	183984876	L98
	rs6849711	4	15150488	T	C	4p15.33	0.2375	0.017	0.0026	4.902e-11	ncRNA_intronic	RP11-665G4.1	7.633	5	T7L7	15149569	23753053	L15
	rs12500531	4	23725345	A	G	4p15.2	0.1711	0.019	0.0031	4.974e-10	ncRNA_intronic	RP11-380P13.1:RP11-380P13.2	2.342	7
	rs10019131	4	94753023	A	G	4q22.2	0.5036	0.0136	0.0022	4.561e-10	intergenic	ATOH1	5.146	5	T7L8	94753023	94753023	L99
	rs2935618	5	2683885	T	C	5p15.33	0.3336	-0.0156	0.0023	2.133e-11	intergenic	RP11-129I19.2	0.021	5	T7L9	2683885	2685812	L18
	rs9382551	6	55597908	A	C	6p12.1	0.9005	0.0214	0.0036	3.439e-09	intergenic	BMP5	6.212	6	T7L10	55565836	55628283	L24
	rs151057105	7	54944920	T	C	7p11.2	0.0955	0.0368	0.0037	2.343e-23	intergenic	SNORA73	0.322	6	T7L11	54931756	54951379	L28
	rs2173537	8	129047325	A	G	8q24.21	0.1606	0.021	0.0031	1.85e-11	ncRNA_intronic	PVT1	8.187	4	T7L12	129047325	129047325	L31
	rs503162	9	14466376	A	C	9p22.3	0.7859	-0.0192	0.0027	9.028e-13	intergenic	RP11-408A13.2	8.072	4	T7L13	14453010	14470106	L32
	rs10821141	9	96258838	T	C	9q22.31	0.3594	0.0145	0.0022	1.047e-10	intronic	FAM120A	0.778	4	T7L14	96202932	96343060	L87
	rs7856659	9	119375255	A	C	9q33.1	0.4754	-0.0152	0.0022	2.727e-12	UTR3	ASTN2	4.671	7	T7L15	119351562	119433973	L33
	rs3751097	11	46916693	T	C	11p11.2	0.1004	-0.0225	0.0037	8.832e-10	intronic	LRP4	4.545	1f	T7L16	46812905	47242761	L100
	rs3885274	11	47119875	A	T	11p11.2	0.3657	-0.0146	0.0023	4.516e-10	intronic	C11orf49	3.156	6
	rs12788188	11	69003581	A	T	11q13.3	0.4849	-0.0132	0.0023	4.298e-09	intergenic	MYEOV	0.466	6	T7L17	68985480	69011692	L38
	rs2892655	12	32490229	A	T	12p11.21	0.2786	0.0197	0.0026	1.255e-14	intronic	BICD1	0.066	6	T7L18	32465107	32558025	L101
	rs2651370	12	32558025	A	G	12p11.21	0.4032	-0.0145	0.0023	1.279e-10	intronic	FGD4	1.75	1f
	rs11111094	12	102328806	A	C	12q23.2	0.456	0.0255	0.0022	3.594e-31	intronic	DRAM1	2.82	4	T7L19	102324872	107229705	L42
	rs79536630	12	102404119	A	T	12q23.2	0.8286	0.0281	0.0029	7.103e-23	intronic	DRAM1	4.915	2a
	rs17797222	12	102913946	A	G	12q23.2	0.7834	0.0204	0.0027	5.866e-14	intergenic	RP11-210L7.1	4.433	5
	rs4964491	12	107222515	A	G	12q23.3	0.2558	-0.0166	0.0025	3.679e-11	intronic	RIC8B	0.146	6
	rs34421054	12	118437058	T	C	12q24.23	0.2687	0.0162	0.0026	7.702e-10	intergenic	RFC5	2.295	7	T7L20	118437058	118437058	L61
	rs2359237	14	75245002	A	G	14q24.3	0.532	-0.0147	0.0023	2.582e-10	intronic	YLPM1	1.672	6	T7L21	75228486	75316023	L44
	rs11625009	14	88987362	A	T	14q31.3	0.3241	-0.0141	0.0023	1.402e-09	intronic	PTPN21	0.033	5	T7L22	88836305	89012740	L102
	rs3803662	16	52586341	A	G	16q12.1	0.315	-0.016	0.0024	3.073e-11	ncRNA_exonic	CASC16	5.772	5	T7L23	52545277	52871674	L45
	rs1833195	16	52820945	T	C	16q12.2	0.5475	0.0176	0.0022	1.101e-15	intergenic	RP11-297L17.6	0.196	6
	rs35007640	18	35286743	C	G	18q12.2	0.552	0.0139	0.0023	7.581e-10	intergenic	RP11-19F9.1	0.372	7	T7L24	35286743	35286743	L91
	rs1865278	18	37995211	T	C	18q12.3	0.6904	0.017	0.0025	1.808e-11	intergenic	RNU7-145P	3.405	5	T7L25	37989574	38004201	L73
	rs6062265	20	61154794	C	G	20q13.33	0.6453	0.0149	0.0023	1.814e-10	intronic	C20orf166	3.814	2b	T7L26	61149695	61155088	L53
SCP absolute volume	rs7556982	2	237644199	A	G	2q37.3	0.5949	0.0489	0.0058	5.514e-17	ncRNA_intronic	AC011286.1	4.769	7	T8L1	237615524	237663149	L103
	rs2306272	3	66434643	T	C	3p14.1	0.6636	-0.0418	0.0064	6.378e-11	exonic (missense)	LRIG1	17.24	5	T8L2	66343149	66444697	L104
	rs36083520	4	23715876	T	C	4p15.2	0.8246	-0.0525	0.008	6.591e-11	ncRNA_intronic	RP11-380P13.1	14.25	6	T8L3	23715876	23848631	L15
	rs6448227	4	23848631	T	C	4p15.2	0.2191	-0.0423	0.007	1.603e-09	intronic	PPARGC1A	3.613	6
	rs72762452	5	64880232	T	C	5q12.3	0.756	-0.0476	0.0068	1.818e-12	intronic	PPWD1	8.727	6	T8L4	64779214	65006234	L20
	rs17727841	12	102809630	C	G	12q23.2	0.1768	0.0559	0.0075	8.072e-14	intronic	IGF1	0.749	1f	T8L5	102501068	102859649	L62
	rs6122009	20	61161749	T	C	20q13.33	0.2259	0.0419	0.007	1.861e-09	intronic	C20orf166	3.148	1f	T8L6	61161749	61167632	L53
SCP relative volume	rs7556982	2	237644199	A	G	2q37.3	0.5952	0.049	0.0053	1.33e-20	ncRNA_intronic	AC011286.1	4.769	7	T9L1	237615524	237663149	L103
	rs2306272	3	66434643	T	C	3p14.1	0.6635	-0.0338	0.0057	3.871e-09	exonic (missense)	LRIG1	17.24	5	T9L2	66425302	66434643	L104
	rs36083520	4	23715876	T	C	4p15.2	0.8247	-0.0456	0.0072	3.14e-10	ncRNA_intronic	RP11-380P13.1	14.25	6	T9L3	23715876	23715876	L15
	rs6830774	4	57816306	T	C	4q12	0.5527	-0.0377	0.0052	6.898e-13	intergenic	RP11-738E22.3	0.21	7	T9L4	57803505	57823457	L105
	rs2286184	7	84630516	T	C	7q21.11	0.2488	0.0408	0.0062	5.65e-11	intronic	SEMA3D	17.9	3a	T9L5	84358036	84688196	L106
	rs10781130	9	75824432	A	G	9q21.13	0.2866	-0.0412	0.0061	1.295e-11	intergenic	ANXA1	3.807	6	T9L6	75818300	75841337	L107
	rs12435718	14	69279879	A	G	14q24.1	0.6973	-0.0335	0.0057	2.999e-09	intergenic	ZFP36L1	3.656	7	T9L7	69255334	69307176	L63
	rs113122856	17	9143458	A	G	17p13.1	0.8377	-0.0475	0.0075	2.071e-10	UTR3	NTN1	7.457	2b	T9L8	9143458	9155926	L108
Note: TnLm mean the mth locus for the nth trait. Ln is the nth LD-independent locus. Abbereviations: A1, effect allele; A2, non-effect allele; CADD, combined annotation-dependent depletion; CHR, chromosome; EAF, effect allele frequency; Nearest Gene, protein-coding gene containing the lead variant or nearest to the lead variant; RDB, RegulomeDB; SE, standard error.

[truncated: 26 more sheets: Table S10, Table S11, Table S12, Table S13, Table S14, Table S15, Table S16, Table S17, Table S18, Table S19, Table S20, Table S21, Table S22, Table S23, Tabls S24, Table S25, Table S26, Table S27, Table S28, Table S29 …]
